# Supplementary material for: The protein translocation systems in plants – composition and variability on the example of Solanum lycopersicum
Source: BMC Genomics. 2013 Mar 18;14:189. doi: 10.1186/1471-2164-14-189 (PMC3610429; doi:10.1186/1471-2164-14-189)
Supplement: Additional file 1: — List of references for each factor of the respective translocation machinery from the literature-based search. The first column gives the compartment and the second the translocation factor. The following columns (3 – 6) represent the reference, where the factor was either confirmed experimentally or predicted as homologous to a translocation factor. The last column gives the information if references in the reference were used. [file 1471-2164-14-189-S1.xls]

## Sheet: reference_factors
Additional file 1. List of references for each factor of the respective translocation machinery from the literature-based search. The first column gives the compartment and the second the translocation factor. The following columns (3 – 6) represent the reference, where the factor was either confirmed experimentally or predicted as homologous to a translocation factor. The last column gives the i…
Compartment	Factor	Author	Journal	Year	Issue / Pages	References therein
Peroxisome	Pex2p	Platta et al	Mol. Cell Biol.	2009	29/5505-5516	n.d.
	Pex10p	William et al	Biochem. Biophy. Res. Commun.	2008	374/620-624	n.d.
	Pex22p	Platta and Erdmann	FEBS Letters	2007	581/2811-2819	yes
		Platta and Erdmann	TRENDS in Cell Biology	2007	17/474-484	yes
	Pex17p	Subramani et al	Annu. Rev. Biochem.	2000	69/399–418	yes
	Ubc4/5	William et al	Biochem. Biophy. Res. Commun.	2008	374/620-624	n.d.
	Pex18p	Purdue et al	J.Cell Biol.	1998	143/1859-1869	n.d.
	Pex13p	Subramani et al	Annu. Rev. Biochem.	2000	69/399–418	yes
	Pex12p	Platta et al	Mol. Cell Biol.	2009	29/5505-5516	n.d.
	Pex3p	Hu et al	Plant Cell	2012	24/2279-2303	yes
	Pex19p	Rucktaschel et al	Biochimica et Biophysica Acta	2011	1808/892-900	yes
	Pex8p	Agne et al	Mol. Cell	2003	11/635-646	n.d.
	Pex7p	Rehling et al	EMBO J.	1996	15/2901-2913	n.d.
	Pex5p	Brocard et al	Biochem Biophys. Commun.	1994	204/1016-1022	n.d.
	Pex4p	Platta et al	J.Cell Biol.	2007	177/197-204	n.d.
	Pex1p	Miyata et al	Mol. Biol. Cell	2005	25/10822-10832	n.d.
	Pex21p	Purdue et al	J.Cell Biol.	1998	143/1859-1869	n.d.
	Pex6p	Miyata et al	Mol. Biol. Cell	2005	25/10822-10832	n.d.
	Pex15p	Birschmann et al	Mol. Biol. Cell	2003	14/2226-2236	n.d.
	Pex14p	Subramani et al	Annu. Rev. Biochem	2000	69/399–418	yes
Chloroplast	Toc159	Soll and Schleiff	Nat. Rev. Mol. Cell. Biol.	2004	5/198-208	yes
	Toc34	Schleiff and Becker	Nat. Rev. Mol. Cell. Biol.	2011	12/48-59	yes
	Toc75	Kalanon and McFadden	Genetics	2008	179/95-112	yes
		Jarvis	New Phytologist	2008	179/257-285	yes
	Toc64	Qbadou et al	EMBO J.	2006	25/1836-1847	n.d.
	Toc12	Becker et al	Mol. Biol. Cell	2004	15/5130-5144	n.d.
	Tic32	Jarvis	New Phytologist	2008	179/257-285	yes
	Tic20
	Tic22
	Tic21	Teng et al	Plant Cell	2006	18/2247-2257	n.d.
	Tic55	Jarvis	New Phytologist	2008	179/257-285	yes
	Tic40	Chou et al	EMBO J.	2003	22/2970-2980	n.d.
	Tic110	Heins et al	EMBO J.	2002	21/2616-2625	n.d.
	Tic62	Jarvis	New Phytologist	2008	179/257-285	yes
	cpSecA2	Skalitzky et al	Plant Physiology	2011	155/354-369	n.d.
	cpSecY2
	cpSecA1	Aldridge et al	FEBS Journal	2009	276/1177-1186	yes
	cpSecY1	Albinaik et al	Jour. of Exp. Botany	2012	63/1689-1698	yes
	cpSecE
	Tha4	Chaddock et al	EMBO J.	1995	14/2715-2722	yes
	Hcf106	Aldridge et al	FEBS Journal	2009	276/1177-1186	yes
	cpTatC
	cpSRP43	Schunemann	PNAS	1998	95/10312-10316	n.d.
	cpSRP54	Schunemann	Curr. Genetics	2004	44/295-304	yes
	cpFtsY	Kogata et al	FEBS Letters	1999	447/329-333	n.d.
	ALB3	Aldridge et al	FEBS Journal	2009	276/1177-1186	yes
Mitochondria	Tim8	Chacinska et al	Cell	2009	138/628-644	yes
	Tim9
	Tom5
	Tom6
	Tom7
	Tom22	Schmidt et al	Nat Rev Mol Cell Biol	2010	11/655-667
	Tom20
	Mdm10
	Sam37
	Tom40
	Oxa1	Becker et al	Trends in Biochem Sci.	2011	37/85-91
	Pam16
	Pam17
	Erv1
	Tim44
	Tim21
	Sam35/Tob38	Carrie et al	BMC Plant Biology	2010	10/249
	Tim23
	Tim22
	Pam18
	Mia40
	Tim10
	Metaxin	Neupert and Hermann	Annu Rev Biochem	2007	76/723-749
	Tom70
	Sam50/Tob55
	Mim1
	Tim12
	Tim13
	Tim17	Schleiff and Becker	Nat. Rev. Mol. Cell. Biol.	2011	12/48-59
	Tim18
	Hot13
	OM64
	Tim54
	Tim50
ERAD	Hrd1	Bagola et al	Biochim. et Biophys Acta	2011	1808/925-936	yes
	Cue1
	Dfm1
	Der1
	Ubc7	Hampton and Sommer	Curr. Opi. In Cell Biol	2012	24/1-7
	Ubc6
	Npl4
	Ufd1	Wolf and Stolz	Biochim. et Biophys Acta	2012	1823/117-124
	Hrd3
	Usa1
	Ubx2	Vembar and Brodsky	Nat Rev Mol Cell Biol	2008	9/944-958
	Doa10
	Cdc48
ER	Srp54p	Kurzchalia et al	Nature	1986	320/634-636	n.d.
		Zimmerman et al	Biochim. et Biophys Acta	2011	1808/912-924	n.d.
		Krieg et al	PNAS	1986	83/8604-8608	n.d.
	SR/SRP101	Tajima et al	J Cell Biol	1986	103/1167-1178	n.d.
	SR/SRP102	Zimmerman et al	Biochim. et Biophys Acta	2011	1808/912-924	n.d.
	Ssh1p	Zimmerman et al	Biochim. et Biophys Acta	2011	1808/912-924	yes
	Sss1p
	Sec63p
	Sec61p
	Sec71p/ Sec66p
	Sbh2p
	Sbh1p
	Srp14p
	Sec65
	Srp72p
	Srp68p
	Sec62p
	Get1	Hegde and Keenan	Nat. Rev. Mol. Cell Biology	2011	12/787-798	n.d.
	Get2
	Get3
	Get4	Shao and Hegde	Annu Rev Cell Dev Biol	2011	27/25-56	n.d.
	Get5
	AtTPR7	Schweiger et al	J Cell Sci.	2012	125/5196-5207	n.d.
	Srp21	Zimmerman et al	Biochim. et Biophys Acta	2011	1808/912-924	yes
	Srp7p
	Sgt2
	Sec72p/ Sec67p
