# Supplementary material for: The protein translocation systems in plants – composition and variability on the example of Solanum lycopersicum
Source: BMC Genomics. 2013 Mar 18;14:189. doi: 10.1186/1471-2164-14-189 (PMC3610429; doi:10.1186/1471-2164-14-189)
Supplement: Additional file 2: — The number of orthologues of translocation factors identified via Inparanoid and OrthoMCL. The number of orthologues of translocation factors identified via InParanoid and OrthoMCL. The first column represents the compartment and second- the translocation factor. The following columns (3 – 17) represent the number of detected orthologues in the different species: S. cerevisiae, A. thaliana, S. lycopersicum, S. tuberosum, G. max, B. distachyon, L. japonicus, M. truncatula, O. sativa, P. patens, C. reinhardtii, P. trichocarpa, S. bicolor, V. vinifera and Z. mays. In column 3–5 (S. cerevisiae, A. thaliana and S. lycopersicum), the first number is the ‘number of orthologues detected by OrthoMCL’ and the second number is the ‘number of orthologues detected via Inparanoid’. [file 1471-2164-14-189-S2.xlsx]

## Sheet: ortho_arabinum
Additional file 2. The number of orthologues of translocation factors identified via InParanoid and OrthoMCL. The first column gives the compartment and the second the translocation factor. The following columns (3 – 17) represent the number of detected orthologues in the different species: S. cerevisiae, A. thaliana, S. lycopersicum, S. tuberosum, G. max, B. distachyon, L. japonicus, M. truncatu…
Compartment	Factor	S. cerevisiae	A. thaliana	S. lycopersicum	S. tuberosum	G. max	B. distachyon	L. japonicus	M. truncatula	O. sativa	P. patens	C. reinhardtii	P. trichocarpa	S. bicolor	V. vinifera	Z. mays
Peroxisome	Pex2p	1/1	1/1	1/1	1	2	1	1	1	1	1	1	2	2	1	1
	Pex10p	1/1	1/1	1/1	2	1	1	1	2	1	1	1	1	1	1	1
	Pex22p	0/0	1/1	2/2	0	2	1	2	1	1	2	1	2	1	1	2
	Pex13p	0/0	1/1	1/1	2	3	1	2	1	1	0	0	2	1	0	1
	Pex12p	1/1	1/1	1/1	1	2	1	1	1	1	1	1	2	1	1	1
	Pex3	0/1	2/2	1/1	2	2	1	1	1	1	3	0	2	1	1	1
	Ubc5/Ubc4	2/2	4/5	8/8	8	7	3	1	2	4	4	1	7	5	4	6
	Ubc5	0/0	1/1	0/0	0	0	0	0	0	0	0	0	0	0	0	0
	Ubc5	0/0	1/1	0/0	1	2	2	0	1	2	0	0	1	1	2	1
	Pex19p	1/1	2/2	1/1	2	2	1	1	1	1	1	0	2	1	1	2
	Pex7p	1/1	1/1	1/1	7	2	1	1	1	1	2	1	1	1	0	1
	Pex5p	1/1	1/1	1/1	1	0	1	1	1	1	1	1	2	1	1	2
	Pex4p	1/1	1/1	1/1	1	1	1	1	1	1	1	1	2	1	1	1
	Pex1p	1/1	1/1	1/1	0	1	2	2	1	1	1	0	1	1	1	1
	Pex6p	1/1	1/1	1/1	4	2	1	1	1	1	1	1	1	1	1	1
	Pex15p	0/0	1/1	2/2	1	2	1	1	1	1	1	0	1	1	1	1
	Pex14p	0/0	1/1	0/2	0	1	0	1	0	0	0	0	0	0	0	0
Chloroplast	cpFtsY	0/0	1/1	1/1	3	2	1	1	1	1	1	1	1	1	1	0
	cpTatC	0/0	1/1	1/1	1	2	1	1	1	1	2	1	1	1	1	2
	atTic110	0/0	1/1	1/1	0	3	1	1	2	1	2	1	2	1	1	1
	atToc12	0/0	1/1	2/2	2	2	0	1	1	0	8	0	2	1	1	0
	atTic32-IVa	0/0	3/2	2/3	2	6	1	2	1	1	2	1	2	1	4	1
	atToc120	0/0	3/2	4/1	8	3	3	2	3	3	4	0	6	3	3	6
	atTic20-I	1/0	2/2	3/3	3	4	2	2	2	2	3	2	3	2	3	4
	atToc75-V/AtOEP80	0/0	1/1	2/2	1	2	1	2	1	1	1	1	2	1	1	2
	atTic55	0/0	1/1	1/1	2	2	1	1	1	1	2	0	2	1	1	1
	cpSecY1	0/0	1/1	1/1	1	1	1	1	1	1	1	1	2	1	1	1
	cpSecY2	0/0	1/1	1/1	0	1	1	3	2	1	1	1	1	1	1	1
	atToc75-III	0/0	1/1	1/1	2	2	2	1	2	3	3	1	2	2	1	3
	cpSecA1	0/0	3/1	4/1	4	5	3	4	6	3	3	2	3	3	3	4
	cpSecA2	0/0	3/2	4/1	4	5	3	4	6	3	3	2	3	3	3	4
	Hcf106	0/0	1/1	1/1	5	2	1	1	1	1	2	1	2	1	1	1
	atTic22-IV	0/0	1/1	1/1	3	2	1	1	1	1	2	1	2	1	1	1
	ALB3	0/0	1/1	1/1	2	2	1	1	1	1	2	1	2	1	1	2
	cpSRP43	0/0	1/1	1/1	1	1	1	1	1	1	1	1	1	1	0	1
	atTic20-V	0/0	1/1	1/1	1	3	1	0	1	1	1	1	1	0	1	1
	atToc64-V	0/0	2/1	2/1	2	5	2	3	2	2	3	0	3	2	2	2
	atTic22-III	0/0	1/1	1/1	1	1	1	1	1	1	0	0	1	1	1	1
	atToc132	0/0	3/2	4/1	8	3	3	2	3	3	4	0	6	3	3	6
	atToc64-I	0/0	1/1	1/1	1	2	1	0	1	2	0	1	3	1	1	1
	atToc90	0/0	1/1	1/1	3	2	1	1	1	1	0	0	2	1	0	1
	atToc64-III	0/0	2/1	2/1	2	5	2	3	2	2	3	0	3	2	2	2
	atTic62	0/0	1/1	1/0	6	2	1	1	1	1	1	1	2	1	1	0
	atTic20-IV	0/0	1/1	0/0	0	2	0	1	2	0	0	0	1	0	0	0
	Tic22like	0/0	1/1	1/1	1	2	1	1	1	1	1	0	2	1	1	1
	atTic21	0/0	1/1	1/1	1	2	1	1	1	2	2	1	2	2	1	2
	atToc159	0/0	3/1	4/1	8	3	3	2	3	3	4	0	6	3	3	6
	Tha4	0/0	1/1	1/1	2	4	1	1	1	1	2	1	2	1	1	1
	atTic40	0/0	1/1	1/1	1	2	1	1	1	1	2	0	2	1	1	2
	cpSecE	0/0	1/1	0/0	1	1	0	1	1	0	1	0	1	0	0	0
	atToc34	0/0	1/1	2/2	2	2	1	1	2	1	2	1	1	1	2	2
	atToc33	0/0	1/1	0/0	0	0	0	0	0	0	0	0	0	0	0	0
	atTic20-II	0/0	1/1	1/1	1	1	0	1	1	0	0	1	1	0	0	0
	cpSRP54	0/0	1/1	1/1	2	2	2	1	1	1	1	1	2	2	1	2
Mitochondria	Tim8	1/1	1/1	1/2	2	2	1	2	1	1	2	1	1	1	2	2
	Tim9	1/1	1/1	1/2	1	3	1	0	2	1	2	1	1	2	2	1
	Tom5	0/0	1/1	1/1	1	2	1	0	0	1	1	0	1	1	1	1
	Tom6	0/0	1/1	1/1	1	2	1	0	0	1	2	0	2	1	0	1
	Tom7	0/0	2/2	2/2	2	2	1	0	3	1	2	0	3	1	0	1
	Tom22	0/0	2/2	2/2	1	5	1	0	1	2	2	1	3	1	2	1
	Tom20	0/0	3/1	2/2	1	4	1	1	1	1	2	1	3	1	1	2
	Tom20	0/0	1/1	0/0	0	0	0	0	0	0	0	0	0	0	0	0
	Tom40	0/1	1/2	2/2	3	2	1	1	2	1	1	1	3	1	1	2
	Tom40	1	1	0	0	0	1	0	0	1	0	0	0	1	0	1
	Oxa1	1/1	2/2	1/2	2	2	1	2	2	1	1	1	4	1	1	1
	Pam16	1/1	2/2	3/3	7	2	2	2	2	1	3	1	3	3	2	2
	Erv1	1/1	1/1	1/1	1	2	1	1	1	1	2	2	1	1	1	1
	Tim44	1/1	2/2	1/1	1	1	1	0	2	1	2	1	2	1	1	1
	Tim21	0/0	1/1	1/1	1	2	2	1	1	1	1	1	3	1	1	1
	Tim23	1/1	3/3	2/3	2	4	2	1	3	1	2	1	4	2	1	3
	Tim22	0/1	2/2	1/1	1	2	1	1	2	1	1	1	2	1	1	1
	Pam18	2/1	3/3	2/3	2	3	2	3	1	1	1	1	2	2	1	2
	Mia40	1/0	1/1	1/1	1	2	1	1	1	1	1	0	1	1	1	2
	Tim10	1/1	1/1	2/2	2	4	1	1	1	1	1	1	2	1	1	2
	Metaxin	0/0	1/1	1/1	1	4	1	1	2	1	2	1	1	1	1	1
	Tom70	2/2	2/2	2/2	2	2	1	1	1	1	0	0	2	1	0	1
	Tom70	0	3	3	6	5	3	1	2	3	0	0	4	3	2	3
	Sam50/Tob55	1/1	2/2	1/1	1	4	2	1	2	1	2	1	2	2	1	2
	Tim13	1/1	1/1	1/1	1	2	1	1	1	1	1	1	2	1	1	1
	Tim17	1/1	2/2	2/2	4	3	1	1	1	1	1	1	3	1	1	2
	OM64	0	2/1	2/1	2	5	2	3	2	2	3	0	3	2	2	2
	Tim50	1/0	1/1	1/1	3	2	2	1	1	2	2	1	2	1	2	2
ERAD	Hrd1	1/1	2/2	2/2	3	2	2	2	3	1	1	1	2	2	1	2
	Dfm1	1/1	1/1	1/1	0	2	1	1	1	1	1	1	1	1	1	2
	Ubc7	1/1	3/3	3/4	3	4	2	1	1	2	3	1	4	2	2	2
	Ubc6	1/1	2/2	2/2	2	2	1	1	1	1	1	1	2	1	1	2
	Ufd1	1/1	1/3	1/1	2	2	2	1	1	2	1	1	2	2	1	2
	Ufd1	0	1	0	0	0	0	0	0	0	0	0	0	0	0	0
	Ufd1	0	1	0	0	2	0	2	3	0	0	0	1	0	0	0
	Hrd3	1/1	2/2	1/1	0	2	1	1	1	1	3	1	2	1	1	1
	Ubx2	0/0	1/1	1/1	1	2	1	2	1	1	1	0	2	1	1	2
	Doa10	0/1	1/2	1/1	2	2	1	1	1	1	4	0	2	1	2	2
	Cdc48	1/1	3/3	5/5	6	10	3	4	5	3	6	1	5	4	3	5
ER	Srp54p	1/1	3/3	2/2	3	4	2	2	2	2	2	1	2	3	1	3
	SR/SRP101	1/1	1/1	1/1	2	2	2	2	1	1	2	1	2	2	1	1
	SR/SRP102	1/1	2/2	2/2	2	2	2	1	1	2	1	1	1	3	2	1
	Sss1p	0/1	2/3	0/0	2	2	2	2	2	2	4	1	3	2	2	4
	Sec63p	1/1	2/2	2/2	3	2	2	2	1	1	1	1	2	1	1	3
	Sec61p	1/1	3/3	2/2	3	4	2	1	2	4	2	1	4	1	1	3
	Sbh2p	0/2	2/3	0/2	5	2	0	1	2	1	0	0	2	0	2	0
	Sbh2p	0	1	1	2	2	1	1	2	1	2	1	1	1	0	1
	Sec65	1/1	1/1	1/1	1	2	2	0	1	1	1	1	2	1	2	2
	Srp72p	0/1	2/2	2/4	1	1	1	1	2	1	1	1	1	1	1	1
	Sec62p	0/0	1/1	2/2	3	2	1	1	1	1	2	1	2	1	1	1
	Get3	1/1	1/1	4/2	6	2	1	2	1	1	2	1	2	1	1	1
	Get4	1/1	1/1	2/2	2	2	1	1	1	1	2	1	2	1	1	1
	AtTPR7	0/0	1/1	1/1	1	2	2	1	2	1	1	1	2	1	1	2
	Sbh1p	0/2	2/3	0/2	5	2	0	1	2	1	0	0	2	0	2	0
	Sgt2	0/1	1/1	1/1	0	1	1	1	1	1	0	0	1	1	0	1
