# Supplementary material for: The protein translocation systems in plants – composition and variability on the example of Solanum lycopersicum
Source: BMC Genomics. 2013 Mar 18;14:189. doi: 10.1186/1471-2164-14-189 (PMC3610429; doi:10.1186/1471-2164-14-189)
Supplement: Additional file 3: — The orthologues of translocation factors identified via Inparanoid. The identifiers of the orthologues of translocation factors identified via InParanoid. The first column gives the compartment and the second the translocation factor. The following columns represent the identifier of the orthologues in S. cerevisiae, A. thaliana and S. lycopersicum. [file 1471-2164-14-189-S3.xlsx]

## Sheet: inpara_arabi
Additional file 3. The Identifiers of the orthologues of translocation factors identified via InParanoid. The first column gives the compartment and the second the translocation factor. The following columns represent the orthologues in S. cerevisiae, A. thaliana and S. lycopersicum.
Compartment	Factor	S. cerevisiae	A. thaliana	S. lycopersicum
Peroxisome	Pex2p	YJL210W	AT1G79810	SOLYC06G066570
	Pex10p	YDR265W	AT2G26350	SOLYC04G080930
	Pex22p	YAL055W
			AT3G21865	SOLYC12G005760
				SOLYC07G052600
	Pex17p	YNL214W
	Ubc5 Ubc4	YDR059C	AT5G41700	SOLYC02G083570
		YBR082C	AT1G64230	SOLYC06G082600
			AT2G16740	SOLYC01G095490
			AT5G56150	SOLYC06G007510
			AT3G08690	SOLYC07G066080
				SOLYC10G011740
				SOLYC12G056100
				SOLYC03G033410
			AT5G53300	SOLYC05G050230
				SOLYC08G008220
			AT4G27960	SOLYC03G007470
	Pex18p	YHR160C
	Pex13p	YLR191W
			AT3G07560	SOLYC06G007700
	Pex12p	YMR026C	AT3G04460	SOLYC05G054950
	Pex3p	YDR329C	AT3G18160	SOLYC03G119030
	Pex19p	YDL065C	AT3G03490	SOLYC06G060720
			AT5G17550
	Pex8p	YGR077C
	Pex7p	YDR142C	AT1G29260	SOLYC03G062940
	Pex5p	YDR244W	AT5G56290	SOLYC10G005650
	Pex4p	YGR133W	AT5G25760	SOLYC11G071260
	Pex1p	YKL197C	AT5G08470	SOLYC04G057960
	Pex21p	YGR239C
	Pex6p	YNL329C	AT1G03000	SOLYC06G008730
	Pex15p	YOL044W
			AT3G10572	SOLYC12G017470
				SOLYC07G017290
	Pex14p	YGL153W
			AT5G62810	SOLYC06G071470
				SOLYC03G114330
Chloroplast	Toc159	atToc159	AT4G02510	SOLYC09G074940
		atToc132	AT2G16640	SOLYC01G111240
		atToc120	AT3G16620
		atToc90	AT5G20300	SOLYC07G007650
	Toc34	atToc33	AT1G02280
		atToc34	AT5G05000	SOLYC05G052160
				SOLYC03G095220
	Toc75	atToc75-III	AT3G46740	SOLYC06G076360
		atToc75-V/AtOEP80	AT5G19620	SOLYC11G062070
				SOLYC10G079290
		atToc75-IV	AT4G09080
	Toc64	atToc64-III	AT3G17970	SOLYC03G118690
		atToc64-I	AT1G08980	SOLYC10G086170
		atToc64-V	AT5G09420	SOLYC10G047300
	Toc12	atToc12	AT1G80920	SOLYC03G117590
				SOLYC06G068500
	Tic32	atTic32-IVa	AT4G23430	SOLYC03G025410
			AT4G23420	SOLYC03G025400
				SOLYC03G025390
		atTic32-IVb	AT4G11410	SOLYC08G081200
	Tic20	atTic20-IV	AT4G03320
		atTic20-V	AT5G55710	SOLYC12G015680
		atTic20-I	AT1G04940	SOLYC05G054720
				SOLYC04G076740
		atTic20-II	AT2G47840	SOLYC11G008980
	Tic22	atTic22-III	AT3G23710	SOLYC09G092530
		Tic22like	AT5G62650	SOLYC03G007620
		atTic22-IV	AT4G33350	SOLYC04G079000
	Tic21	atTic21	AT2G15290	SOLYC01G107640
	Tic55	atTic55	AT2G24820	SOLYC12G096550
	Tic40	atTic40	AT5G16620	SOLYC11G020300
	Tic110	atTic110	AT1G06950	SOLYC09G031780
	Tic62	atTic62	AT3G18890
	cpSecA2	cpSecA2	AT1G21650	SOLYC11G005020
			AT1G21651
	cpSecY2	cpSecY2	AT2G31530	SOLYC09G065120
	cpSecA1	cpSecA1	AT4G01800	SOLYC01G080840
	cpSecY1	cpSecY1	AT2G18710	SOLYC07G006520
	cpSecE	cpSecE	AT4G14870
	Tha4	Tha4	AT5G28750	SOLYC01G097310
	Hcf106	Hcf106	AT5G52440	SOLYC03G025310
	cpTatC	cpTatC	AT2G01110	SOLYC05G008530
	cpSRP43	cpSRP43	AT2G47450	SOLYC02G087400
	cpSRP54	cpSRP54	AT5G03940	SOLYC09G009940
	cpFtsY	cpFtsY	AT2G45770	SOLYC01G091580
	ALB3	ALB3	AT2G28800	SOLYC11G066110
Mitochondria	Tim8	YJR135W-A	AT5G50810	SOLYC06G072600
				SOLYC03G097640
	Tim9	YEL020W-A	AT3G46560	SOLYC10G086510
				SOLYC08G048070
	Tom5	YPR133W-A
			AT5G08040	SOLYC03G115030
	Tom6	YOR045W
			AT1G49410	SOLYC01G109220
	Tom7	YNL070W
			AT1G64220	SOLYC05G047390
			AT5G41685	SOLYC07G015970
	Tom22	YNL131W
			AT1G04070	SOLYC06G008120
			AT5G43970
	Tom20	YGR082W
			AT3G27080	SOLYC02G094140
				SOLYC02G068130
			AT1G27390
			AT5G40930
			AT3G27070
	Mdm10	YAL010C
	Sam37	YMR060C
	Tom40	YMR203W	AT1G50400	SOLYC06G007710
			AT3G20000	SOLYC06G082800
	Oxa1	YER154W	AT2G46470	SOLYC08G082290
			AT5G62050	SOLYC08G008320
	Pam16	YJL104W	AT5G61880	SOLYC06G068820
			AT3G59280	SOLYC00G074210
				SOLYC08G006120
	Pam17	YKR065C
	Erv1	YGR029W	AT1G49880	SOLYC11G071960
	Tim44	YIL022W	AT2G36070	SOLYC01G098230
			AT2G20510
	Tim21	YGR033C
			AT4G00026	SOLYC08G081430
	Sam35/Tob38	YHR083W
	Tim23	YNR017W	AT1G17530	SOLYC10G024350
			AT1G72750	SOLYC03G121860
			AT3G04800	SOLYC12G049220
	Tim22	YDL217C	AT1G18320	SOLYC11G068980
			AT3G10110
	Pam18	YNL328C	AT3G09700	SOLYC10G086040
			AT5G03030	SOLYC09G007390
			AT2G35795	SOLYC06G072330
	Mia40	YKL195W
			AT5G23395	SOLYC04G008770
	Tim10	YHR005C-A	AT2G29530	SOLYC09G011760
				SOLYC06G005840
	Metaxin		AT2G19080	SOLYC07G009320
	Tom70	YNL121C	AT1G62390	SOLYC02G081200
		YHR117W	AT5G20360	SOLYC02G036360
	Sam50/Tob55	YNL026W	AT5G05520	SOLYC04G079270
			AT3G11070
	Mim1	YOL026C
	Tim12	YBR091C
	Tim13	YGR181W	AT1G61570	SOLYC08G083380
	Tim17	YJL143W	AT1G20350	SOLYC11G039910
			AT2G37410	SOLYC06G082270
	Tim18	YOR297W
		YDR178W
		YRL164W
	Hot13	YKL084W
	OM64		AT5G09420	SOLYC10G047300
	Tim54	YJL054W
	Tim50	YPL063W
			AT1G55900	SOLYC10G006020
ERAD	Hrd1	YOL013C	AT1G65040	SOLYC03G096930
			AT3G16090	SOLYC06G072790
	Cue1	YMR264W
	Dfm1	YDR411C	AT4G29330	SOLYC05G026310
	Der1	YBR201W
	Ubc7	YMR022W	AT5G59300	SOLYC04G011430
			AT3G55380	SOLYC05G054550
			AT3G46460	SOLYC05G054540
				SOLYC09G009720
	Ubc6	YER100W	AT5G50430	SOLYC06G063100
			AT1G17280	SOLYC03G123660
	Npl4	YBR170C
	Ufd1	YGR048W	AT2G21270	SOLYC01G110410
			AT4G38930
			AT2G29070
	Hrd3	YLR207W	AT1G18260	SOLYC03G118670
			AT1G73570
	Usa1	YML029W
	Ubx2	YML013W
			AT3G27310	SOLYC02G093820
	Doa10	YIL030C	AT4G32670	SOLYC01G107880
			AT4G34100
	Cdc48	YDL126C	AT3G09840	SOLYC11G069720
			AT5G03340	SOLYC09G008070
			AT3G53230	SOLYC03G112590
				SOLYC10G084050
				SOLYC06G074980
ER	Srp54p	YPR088C	AT5G49500	SOLYC03G116810
			AT1G48900	SOLYC12G042740
			AT1G15310
	SR/SRP101	YDR292C	AT4G30600	SOLYC12G009990
	SR/SRP102	YKL154W	AT2G18770	SOLYC11G043150
			AT5G05670	SOLYC03G112450
	Ssh1p	YBR283C
	Sss1p	YDR086C	AT4G24920
			AT3G48570
			AT5G50460
	Sec63p	YOR254C	AT4G21180	SOLYC03G007610
			AT1G79940	SOLYC09G009180
	Sec61p	YLR378C	AT1G29310	SOLYC02G072130
			AT1G78720	SOLYC10G007390
			AT2G34250
	Sec71p/ Sec66p	YBR171W
	Sbh2p	YER019C-A	AT5G60460	SOLYC03G116990
	Sbh1p	YER087C-B	AT3G60540	SOLYC06G010060
			AT2G45070
	Srp14p	YDL092W
	Sec65	YML105C	AT1G48160	SOLYC08G082740
	Srp72p	YPL210C	AT1G67680	SOLYC10G033560
			AT1G67650	SOLYC00G287330
				SOLYC11G062270
				SOLYC01G047590
	Srp68p	YPL243W
	Sec62p	YPL094C
			AT3G20920	SOLYC01G008470
				SOLYC11G065690
	Get1	YGL020C
	Get2	YER083C
	Get3	YDL100C	AT1G01910	SOLYC10G017810
				SOLYC01G091880
	Get4	YOR164C	AT5G63220	SOLYC12G017820
				SOLYC08G015990
	Get5	YOL111C
	AtTPR7		AT5G21990	SOLYC06G073840
	Srp21	YKL122C
	Srp7p
	Sgt2	YOR007C	AT4G08320	SOLYC11G012900
	Sec72p/ Sec67p	YLR292C
