# Supplementary material for: The protein translocation systems in plants – composition and variability on the example of Solanum lycopersicum
Source: BMC Genomics. 2013 Mar 18;14:189. doi: 10.1186/1471-2164-14-189 (PMC3610429; doi:10.1186/1471-2164-14-189)
Supplement: Additional file 4: — The orthologues of translocation factors identified via OrthoMCL. The identifier of orthologues of translocation factors identified via OrthoMCL. The first column gives the compartment and the second the translocation factor. The following columns (3 – 17) give the identifier of detected orthologues in the different species: S. cerevisiae, A. thaliana, S. lycopersicum, S. tuberosum, G. max, B. distachyon, L. japonicus, M. truncatula, O. sativa, P. patens, C. reinhardtii, P. trichocarpa, S. bicolor, V. vinifera and Z. mays. [file 1471-2164-14-189-S4.xlsx]

## Sheet: ortho_arabi
Additional file 4. The Identifier of orthologues of translocation factors identified via OrthoMCL. The first column gives the compartment and the second the translocation factor. The following columns (3 – 17) give the identifier of detected orthologues in the different species: S. cerevisiae, A. thaliana, S. lycopersicum, S. tuberosum, G. max, B. distachyon, L. japonicus, M. truncatula, O. sativ…
Compartment	Factor	S. cerevisiae	A. thaliana	S. lycopersicum	S. tuberosum	G. max	B. distachyon	L. japonicus	M. truncatula	O. sativa	P. patens	C. reinhardtii	P. trichocarpa	S. bicolor	V. vinifera	Z. mays
Peroxisome	Pex2p	YJL210W	AT1G79810	SOLYC06G066570	PGSC0003DMP400028858	GLYMA08G21760	BRADI3G17110	LJSGA_037683	MEDTR8G013660	LOC_OS05G19480	PP1S312_65V6	CRE17.G698800	POPTR_0001S18670	SB08G021700	GSVIVT01017049001	GRMZM2G116714
						GLYMA07G02110							POPTR_0003S05000	SB08G020920
	Pex10p	YDR265W	AT2G26350	SOLYC04G080930	PGSC0003DMP400006714	GLYMA14G11290	BRADI1G21710	CHR5.CM0034.410	MEDTR1G015360	LOC_OS07G41800	PP1S223_105V6	CRE07.G337050	POPTR_0006S23860	SB02G039010	GSVIVT01035453001	GRMZM2G111614
					PGSC0003DMP400006712				MEDTR1G015390
	Pex22p	YAL055W
	Pex22p		AT3G21865	SOLYC12G005760		GLYMA13G38280	BRADI5G22720	CHR3.CM0155.240	MEDTR2G088850	LOC_OS04G53690	PP1S25_340V6	CRE06.G283150	POPTR_0017S06620	SB06G029430	GSVIVT01030625001	GRMZM2G148633
				SOLYC07G052600		GLYMA12G32190		CHR3.CM0152.480			PP1S25_339V6		POPTR_0007S02630			GRMZM2G164400
	Pex17p	YNL214W
	Ubc5	YDR059C	AT5G41700	SOLYC06G082600	PGSC0003DMP400035742	GLYMA06G13020	BRADI2G45550	CHR3.CM0047.270	MEDTR3G062450	LOC_OS06G30970	PP1S65_161V6	CRE16.G693700	POPTR_0012S01250	SB03G038120	GSVIVT01025872001	GRMZM2G173756
	Ubc4	YBR082C	AT1G64230	SOLYC06G007510	PGSC0003DMP400008892	GLYMA02G40330	BRADI1G39270		MEDTR5G075580	LOC_OS01G46926	PP1S69_142V6		POPTR_0001S47520	SB10G020030	GSVIVT01027045001	GRMZM5G814314
			AT5G53300	SOLYC12G056100	PGSC0003DMP400038546	GLYMA18G44850	BRADI5G25460			LOC_OS04G57220	PP1S69_31V6		POPTR_0006S11070	SB03G030010	GSVIVT01024546001	GRMZM5G866947
			AT4G27960	SOLYC08G008220	PGSC0003DMP400015967	GLYMA09G40960				LOC_OS02G16040	PP1S34_302V6		POPTR_0011S17120	SB06G032120	GSVIVT01014758001	GRMZM2G165511
				SOLYC05G050230	PGSC0003DMP400056254	GLYMA04G41750							POPTR_0019S15200	SB02G019480		GRMZM2G102471
				SOLYC10G011740	PGSC0003DMP400010256	GLYMA14G38620							POPTR_0003S13600			GRMZM2G156517
				SOLYC07G066080	PGSC0003DMP400053032	GLYMA08G35600							POPTR_0015S06060
				SOLYC03G007470	PGSC0003DMP400053031
	Ubc5		AT5G56150
	Ubc5		AT3G08690		PGSC0003DMP400033697	GLYMA19G44230	BRADI2G22200		MEDTR7G116940	LOC_OS01G60410			POPTR_0001S10290	SB09G023560	GSVIVT01028729001	GRMZM2G132759
						GLYMA03G41630	BRADI2G53430			LOC_OS01G60360					GSVIVT01019484001
	Pex18p	YHR160C
	Pex13p	YLR191W
	Pex13p		AT3G07560	SOLYC06G007700	PGSC0003DMP400035712	GLYMA11G13380	BRADI1G58470	CHR3.CM0106.770	MEDTR2G099360	LOC_OS07G05810			POPTR_0014S17220	SB02G003110		GRMZM2G324471
					PGSC0003DMP400035895	GLYMA15G03210		CHR3.CM0091.240					POPTR_0017S04970
						GLYMA13G42170
	Pex12p	YMR026C	AT3G04460	SOLYC05G054950	PGSC0003DMP400040681	GLYMA19G43700	BRADI3G28320	CHR1.CM0600.200	MEDTR1G116380	LOC_OS10G32960	PP1S26_47V6	CRE06.G263602	POPTR_0019S03680	SB01G019750	GSVIVT01023441001	GRMZM2G023970
						GLYMA03G41050							POPTR_0013S04500
	Pex3p	YDR329C
	Pex3p		AT3G18160	SOLYC03G119030	PGSC0003DMP400009961	GLYMA05G34080	BRADI1G77830	CHR4.CM0042.2030	MEDTR8G106780	LOC_OS09G14510	PP1S16_308V6		POPTR_0012S04710	SB02G021030	GSVIVT01008394001	GRMZM2G116004
			AT1G48635		PGSC0003DMP400009960	GLYMA08G05600					PP1S114_119V6		POPTR_0015S04240
											PP1S9_63V6
	Pex19p	YDL065C	AT3G03490	SOLYC06G060720	PGSC0003DMP400008528	GLYMA17G15080	BRADI3G50800	CHR4.CM0281.70	MEDTR4G100930	LOC_OS02G44220	PP1S358_23V6		POPTR_0003S07470	SB04G032760	GSVIVT01001328001	GRMZM2G102502
			AT5G17550		PGSC0003DMP400021056	GLYMA05G04650							POPTR_0001S15810			GRMZM2G004768
	Pex8p	YGR077C
	Pex7p	YDR142C	AT1G29260	SOLYC03G062940	PGSC0003DMP400015333	GLYMA13G30230	BRADI3G09200	LJSGA_022091	CONTIG_57916_2	LOC_OS02G14790	PP1S392_16V6	CRE17.G730200	POPTR_0004S05630	SB04G008710		GRMZM2G159849
					PGSC0003DMP400015332	GLYMA15G08910					PP1S124_67V6
					PGSC0003DMP400015331
					PGSC0003DMP400015330
					PGSC0003DMP400015328
					PGSC0003DMP400015329
					PGSC0003DMP400015828
	Pex5p	YDR244W	AT5G56290	SOLYC10G005650	PGSC0003DMP400019880		BRADI3G39510	LJSGA_051658	MEDTR3G009230	LOC_OS08G39080	PP1S150_16V6	CRE14.G616750	POPTR_0001S47700	SB07G028340	GSVIVT01014864001	GRMZM2G115855
													POPTR_0011S17280			GRMZM2G080775
	Pex4p	YGR133W	AT5G25760	SOLYC11G071260	PGSC0003DMP400032379	GLYMA06G08720	BRADI3G49600	CHR1.LJT04O06.110	AC225507_39	LOC_OS02G42314	PP1S159_159V6	CRE05.G240150	POPTR_0018S00610	SB04G026910	GSVIVT01035654001	GRMZM5G828302
													POPTR_0006S25760
	Pex1p	YKL197C	AT5G08470	SOLYC04G057960		GLYMA07G35030	BRADI4G38187	CHR4.CM0229.160	MEDTR4G083460	LOC_OS08G44240	PP1S285_12V6		POPTR_0001S17400	SB07G024470	GSVIVT01013614001	GRMZM2G070305
							BRADI3G42670	CHR4.CM0229.200
	Pex21p	YGR239C
	Pex6p	YNL329C	AT1G03000	SOLYC06G008730	PGSC0003DMP400009471	GLYMA19G39580	BRADI5G21890	CHR1.CM0109.170	MEDTR7G089290	LOC_OS04G52690	PP1S68_6V6	CRE10.G446250	POPTR_0014S12750	SB06G028670	GSVIVT01010963001	GRMZM2G445617
					PGSC0003DMP400009473	GLYMA03G36930
					PGSC0003DMP400009472
					PGSC0003DMP400009474
	Pex15p	YOL044W
	Pex15p		AT3G10572	SOLYC12G017470	PGSC0003DMP400011462	GLYMA01G00470	BRADI1G34360	CHR1.CM0104.2840	CONTIG_74130_1	LOC_OS06G48970	PP1S199_128V6		POPTR_0006S07830	SB10G029170	GSVIVT01000235001	GRMZM2G178371
				SOLYC07G017290		GLYMA07G15670
	Pex14p	YGL153W
	Pex14p		AT5G62810			GLYMA06G19390		LJSGA_050863
Chloroplast	atToc132		AT2G16640	SOLYC11G043010	PGSC0003DMP400016933	GLYMA08G13100	BRADI1G02680	LJSGA_021142	MEDTR8G088370	LOC_OS05G05950	PP1S123_61V6		POPTR_0009S13370	SB01G002230	GSVIVT01024062001	GRMZM2G373341
	atToc120		AT3G16620	SOLYC01G111240	PGSC0003DMP400016934	GLYMA05G29990	BRADI2G35587	LJSGA_068427	MEDTR2G030630	LOC_OS03G61890	PP1S123_63V6		POPTR_0010S01800	SB09G004020	GSVIVT01017736001	GRMZM2G448523
	atToc159		AT4G02510	SOLYC09G074940	PGSC0003DMP400011174	GLYMA11G11250	BRADI2G06810		MEDTR2G030160	LOC_OS10G40110	PP1S136_59V6		POPTR_0004S17740	SB01G029790	GSVIVT01027981001	GRMZM2G389118
				SOLYC01G080780	PGSC0003DMP400020186						PP1S136_62V6		POPTR_0008S22140			GRMZM5G861756
					PGSC0003DMP400020187								POPTR_0009S13380			GRMZM2G326272
					PGSC0003DMP400002883								POPTR_0008S22130			GRMZM2G351125
					PGSC0003DMP400002885
					PGSC0003DMP400002884
	atToc90		AT5G20300	SOLYC07G007650	PGSC0003DMP400053490	GLYMA17G11770	BRADI4G40530	LJSGA_052087	MEDTR4G115710	LOC_OS12G09570			POPTR_0025S00620	SB08G006190		GRMZM2G100579
					PGSC0003DMP400053491	GLYMA13G23110							POPTR_0006S06230
					PGSC0003DMP400053489
	atToc12		AT1G80920	SOLYC03G117590	PGSC0003DMP400049585	GLYMA07G02480		CHR3.LJT40P18.90	MEDTR4G007300		PP1S112_204V6		POPTR_0001S03470	SB04G025270	GSVIVT01015991001
				SOLYC06G068500	PGSC0003DMP400024998	GLYMA08G23540					PP1S110_50V6		POPTR_0003S18190
											PP1S17_157V6
											PP1S354_16V6
											PP1S35_131V6
											PP1S100_202V6
											PP1S159_108V6
											PP1S227_127V6
	atToc75-V/AtOEP80		AT5G19620	SOLYC11G062070	PGSC0003DMP400014321	GLYMA13G41560	BRADI3G07090	LJSGA_028107	MEDTR2G098110	LOC_OS02G10260	PP1S1_532V6	CRE02.G122700	POPTR_0003S20390	SB04G006590	GSVIVT01025300001	GRMZM2G130064
				SOLYC10G079290		GLYMA15G03840		LJSGA_071729					POPTR_0001S05640			GRMZM2G028005
	atToc75-III		AT3G46740	SOLYC06G076360	PGSC0003DMP400052941	GLYMA15G04030	BRADI4G25730	LJSGA_039209	MEDTR2G097700	LOC_OS03G16440	PP1S317_51V6	CRE03.G175200	POPTR_0001S12500	SB02G037210	GSVIVT01024913001	GRMZM5G820904
					PGSC0003DMP400052940	GLYMA13G41370	BRADI1G66820		MEDTR4G064780	LOC_OS12G02385	PP1S23_111V6		POPTR_0003S15670	SB01G039800		GRMZM2G001918
	atToc64-V		AT5G09420	SOLYC10G047300	PGSC0003DMP400010218	GLYMA08G05870	BRADI1G11110	CHR4.CM0182.360	MEDTR8G107280	LOC_OS03G50010	PP1S167_52V6		POPTR_0012S04440	SB04G027530	GSVIVT01008433001	GRMZM2G159542
	atToc64-III		AT3G17970	SOLYC03G118690	PGSC0003DMP400029153	GLYMA08G19070	BRADI3G58760	CHR4.CM0042.2360	CONTIG_55928_1	LOC_OS02G51810	PP1S42_259V6		POPTR_0015S04580	SB01G010650	GSVIVT01038788001	GRMZM5G819320
						GLYMA05G33810		CHR6.CM0314.20			PP1S301_54V6		POPTR_0001S21240
						GLYMA15G05920
						GLYMA05G24400
	atToc64-I		AT1G08980	SOLYC10G086170	PGSC0003DMP400065555	GLYMA20G37660	BRADI5G27490		MEDTR1G082750	LOC_OS04G02780		CRE18.G747150	POPTR_0013S02500	SB02G039510	GSVIVT01000036001	GRMZM2G169087
						GLYMA10G29640				LOC_OS04G02754			POPTR_1567S00200
													POPTR_0013S02510
	atToc34		AT5G05000	SOLYC05G052160	PGSC0003DMP400020650	GLYMA19G30210	BRADI1G68540	CHR1.CM0098.80	MEDTR7G088050	LOC_OS03G13730	PP1S54_12V6	CRE06.G252200	POPTR_0002S18420	SB01G041460	GSVIVT01011531001	GRMZM2G157157
				SOLYC03G095220	PGSC0003DMP400009339	GLYMA03G00600			CONTIG_56894_1		PP1S72_197V6				GSVIVT01024469001	GRMZM2G159777
	atToc33		AT1G02280
	atTic110		AT1G06950	SOLYC09G031780		GLYMA02G39990	BRADI3G29750	LJSGA_031563	CONTIG_50192_1	LOC_OS10G35010	PP1S26_23V6	CRE10.G452450	POPTR_0013S15040	SB01G018450	GSVIVT01024601001	GRMZM5G888696
						GLYMA14G38140			MEDTR5G074690		PP1S509_22V6		POPTR_0019S14760
						GLYMA18G06260
	atTic32-IVa		AT4G11410	SOLYC03G025410	PGSC0003DMP400027707	GLYMA16G30060	BRADI4G38730	CHR4.CM0004.630	CONTIG_10663_2	LOC_OS09G39670	PP1S337_5V6	CRE12.G556750	POPTR_0015S12880	SB02G012420	GSVIVT01028899001	GRMZM2G009940
	atTic32-IVb		AT4G23430	SOLYC08G081200	PGSC0003DMP400021835	GLYMA08G01870		CHR5.CM0148.80			PP1S198_42V6		POPTR_0003S12880		GSVIVT01019741001
			AT4G23420			GLYMA05G37720									GSVIVT01028898001
						GLYMA10G37760									GSVIVT01028900001
						GLYMA20G30080
						GLYMA10G37750
	atTic55		AT2G24820	SOLYC12G096550	PGSC0003DMP400050963	GLYMA06G06370	BRADI3G53860	LJSGA_095696	MEDTR3G105820	LOC_OS02G54980	PP1S153_103V6		POPTR_0018S02890	SB04G035660	GSVIVT01036007001	GRMZM2G018484
					PGSC0003DMP400050962	GLYMA04G06320					PP1S11_89V6		POPTR_0006S28310
	atTic62		AT3G18890	SOLYC10G051110	PGSC0003DMP400014509	GLYMA11G12900	BRADI4G33940	CHR3.CM0091.700	CONTIG_52521_1	LOC_OS10G01044	PP1S51_261V6	CRE06.G269050	POPTR_0004S15750	SB02G000230	GSVIVT01031907001
					PGSC0003DMP400014508	GLYMA12G05030							POPTR_0009S11450
					PGSC0003DMP400014510
					PGSC0003DMP400014507
					PGSC0003DMP400014506
					PGSC0003DMP400014505
	atTic40		AT5G16620	SOLYC11G020300	PGSC0003DMP400040259	GLYMA18G05480	BRADI5G10800	LJSGA_036969	CONTIG_51042_1	LOC_OS04G35900	PP1S110_13V6		POPTR_0017S02900	SB06G017360	GSVIVT01025999001	GRMZM2G353213
						GLYMA11G31810					PP1S159_2V6		POPTR_0004S08560			GRMZM2G053019
	atTic21		AT2G15290	SOLYC01G107640	PGSC0003DMP400044867	GLYMA20G26500	BRADI3G06460	CHR5.CM0200.3290	CONTIG_76929_1	LOC_OS02G09470	PP1S58_244V6	CRE10.G454771	POPTR_0009S09920	SB04G005930	GSVIVT01003161001	GRMZM2G008859
						GLYMA10G40810				LOC_OS06G43130	PP1S54_55V6		POPTR_0001S30780	SB10G024970		GRMZM2G145500
	atTic20-I	YHR040W	AT1G04940	SOLYC01G074020	PGSC0003DMP400040712	GLYMA07G00850	BRADI1G24250	LJSGA_019366	CONTIG_237704_1	LOC_OS01G73150	PP1S80_26V6	CRE01.G049400	POPTR_0005S25300	SB02G036720	GSVIVT01009769001	GRMZM5G840946
			AT1G04945	SOLYC05G054720	PGSC0003DMP400011330	GLYMA08G22130	BRADI2G61550	CHR3.CM0226.400	CONTIG_61579_1	LOC_OS07G38110	PP1S197_89V6	CRE08.G379650	POPTR_0002S03320	SB03G046740	GSVIVT01001402001	GRMZM2G099463
				SOLYC04G076740	PGSC0003DMP400011209	GLYMA09G27980					PP1S54_101V6		POPTR_0001S23510		GSVIVT01037065001	GRMZM2G171478
						GLYMA16G32840										GRMZM5G827186
	atTic20-IV		AT4G03320			GLYMA12G36070		CHR3.CM0711.340	MEDTR4G098150				POPTR_0019S13630
						GLYMA13G34080			MEDTR5G024800
	atTic20-II		AT2G47840	SOLYC11G008980	PGSC0003DMP400028348	GLYMA18G47900		CHR1.CM0393.220	MEDTR7G080300			CRE01.G039150	POPTR_0013S08250
	atTic20-V		AT5G55710	SOLYC12G015680	PGSC0003DMP400061151	GLYMA14G01760	BRADI3G56350		MEDTR5G095770	LOC_OS02G49470	PP1S5_404V6	CRE04.G225050	POPTR_0004S20320		GSVIVT01014683001	GRMZM2G317451
						GLYMA19G27010
						GLYMA02G46980
	atTic22-III		AT3G23710	SOLYC09G092530	PGSC0003DMP400037895	GLYMA05G28300	BRADI4G27410	CHR4.CM0044.540	CONTIG_168453_1	LOC_OS07G19030			POPTR_0002S23710	SB02G009350	GSVIVT01031575001	GRMZM2G130651
	Tic22like		AT5G62650	SOLYC03G007620	PGSC0003DMP400016811	GLYMA09G24090	BRADI2G07450	LJSGA_130958	CONTIG_50004_1	LOC_OS01G12550	PP1S68_153V6		POPTR_0017S00970	SB03G001210	GSVIVT01028824001	GRMZM2G097959
						GLYMA16G29580							POPTR_0004S07060
	atTic22-IV		AT4G33350	SOLYC04G079000	PGSC0003DMP400014098	GLYMA04G04070	BRADI1G45996	CHR1.CM2113.280	MEDTR3G101630	LOC_OS06G11020	PP1S282_30V6	CRE14.G625750	POPTR_0014S02990	SB10G007160	GSVIVT01009503001	GRMZM5G887716
					PGSC0003DMP400014095	GLYMA06G04250					PP1S81_171V6		POPTR_0002S12830
					PGSC0003DMP400014097
	cpFtsY		AT2G45770	SOLYC01G091580	PGSC0003DMP400048287	GLYMA07G08240	BRADI2G61320	LJSGA_146576	MEDTR8G032340	LOC_OS01G72800	PP1S98_142V6	CRE05.G241450	POPTR_0014S07480	SB03G046390	GSVIVT01027497001
					PGSC0003DMP400048286	GLYMA03G01770
					PGSC0003DMP400048289
	cpTatC		AT2G01110	SOLYC05G008530	PGSC0003DMP400053201	GLYMA10G41400	BRADI2G13660	CHR5.CM0328.90	CONTIG_67714_2	LOC_OS01G31680	PP1S96_56V6	CRE01.G060250	POPTR_0010S12740	SB01G042360	GSVIVT01011805001	GRMZM2G025123
						GLYMA20G25860					PP1S35_261V6					GRMZM2G093254
	cpSecY1		AT2G18710	SOLYC07G006520	PGSC0003DMP400047776	GLYMA06G30020	BRADI3G19100	CHR6.CM0041.220	CONTIG_55610_2	LOC_OS08G15460	PP1S15_445V6	CRE16.G681900	POPTR_0018S10650	SB07G007870	GSVIVT01032310001	GRMZM5G809546
													POPTR_0006S18970
	cpSecY2		AT2G31530	SOLYC09G065120		GLYMA03G30970	BRADI2G26310	LJSGA_073840	CONTIG_55532_1	LOC_OS05G33020	PP1S538_1V6	CRE03.G158250	POPTR_0002S05490	SB09G019570	GSVIVT01011128001	GRMZM5G866861
								LJSGA_070044	CONTIG_93237_1
								LJSGA_013010
	cpSecA1		AT1G21650	SOLYC11G005020	PGSC0003DMP400010741	GLYMA04G42470	BRADI4G23380	LJSGA_012007	CONTIG_12399_1	LOC_OS01G21820	PP1S429_1V6	CRE12.G518000	POPTR_0002S07830	SB03G002770	GSVIVT01028249001	GRMZM2G090020
	cpSecA2		AT1G21651	SOLYC11G005030	PGSC0003DMP400010743	GLYMA10G27810	BRADI2G12067	CHR1.CM0181.630	CONTIG_70755_1	LOC_OS05G34880	PP1S36_277V6	CRE12.G517900	POPTR_0014S10790	SB05G005960	GSVIVT01008813001	GRMZM2G090086
			AT4G01800	SOLYC01G080840	PGSC0003DMP400010745	GLYMA06G12320	BRADI2G24967	CHR1.CM0181.520	CONTIG_58625_2	LOC_OS11G08980	PP1S9_141V6		POPTR_0019S09450	SB03G013090	GSVIVT01008814001	GRMZM2G036497
				SOLYC11G005040	PGSC0003DMP400002084	GLYMA06G12310		CHR1.CM0181.590	CONTIG_239485_1							GRMZM2G309568
						GLYMA02G01060			CONTIG_49426_1
									MEDTR1G086050
	Hcf106		AT5G52440	SOLYC03G025310	PGSC0003DMP400017979	GLYMA10G37690	BRADI1G39520	CHR5.CM0148.60	MEDTR1G100220	LOC_OS11G37130	PP1S93_67V6	CRE08.G371650	POPTR_0015S12830	SB06G014410	GSVIVT01028894001	GRMZM5G898735
					PGSC0003DMP400017978	GLYMA20G30120					PP1S402_22V6		POPTR_0012S12910
					PGSC0003DMP400017977
					PGSC0003DMP400017976
					PGSC0003DMP400017980
	ALB3		AT2G28800	SOLYC11G066110	PGSC0003DMP400000787	GLYMA12G06920	BRADI2G03350	CHR3.CM0786.350	CONTIG_55508_1	LOC_OS01G05800	PP1S381_17V6	CRE17.G729800	POPTR_0009S03440	SB03G006010	GSVIVT01024995001	GRMZM5G839422
					PGSC0003DMP400000788	GLYMA11G14960					PP1S198_153V6		POPTR_0001S24450			GRMZM2G110063
	cpSRP43		AT2G47450	SOLYC02G087400	PGSC0003DMP400002329	GLYMA11G10310	BRADI1G76290	CHR3.CM0460.90	CONTIG_84060_1	LOC_OS03G03990	PP1S137_78V6	CRE32.G781750	POPTR_0009S14260	SB01G048210		GRMZM2G007441
	Tha4		AT5G28750	SOLYC01G097310	PGSC0003DMP400033827	GLYMA03G40740	BRADI1G14210	LJSGA_018399	CONTIG_168782_1	LOC_OS03G43430	PP1S99_257V6	CRE10.G438550	POPTR_0013S03820	SB01G014100	GSVIVT01021788001	GRMZM2G472651
					PGSC0003DMP400033826	GLYMA10G30420					PP1S184_69V6		POPTR_0005S05490
						GLYMA20G36760
						GLYMA19G43430
	cpSecE		AT4G14870		PGSC0003DMP400055487	GLYMA01G44820		CHR1.CM0591.50	MEDTR5G038520		PP1S22_325V6		POPTR_0008S15330
	cpSRP54		AT5G03940	SOLYC09G009940	PGSC0003DMP400015586	GLYMA03G35470	BRADI4G25510	CHR1.CM0010.320	MEDTR7G104890	LOC_OS11G05556	PP1S8_116V6	CRE11.G479750	POPTR_0016S07950	SB05G003290	GSVIVT01033862001	GRMZM2G113093
					PGSC0003DMP400015587	GLYMA19G38110	BRADI4G25490						POPTR_0006S22810	SB08G003410		GRMZM2G127230
Mitochondria	Tim8	YJR135W-A	AT5G50810	SOLYC06G072600	PGSC0003DMP400046962	GLYMA04G37570	BRADI3G41440	CHR4.CM0175.510	MEDTR3G098820	LOC_OS08G42380	PP1S12_60V6	CRE03.G189750	POPTR_0012S10520	SB07G026010	GSVIVT01008600001	GRMZM5G801241
					PGSC0003DMP400046963	GLYMA06G17490		LJSGA_022997			PP1S3_222V6				GSVIVT01033034001	GRMZM2G075003
	Tim9	YEL020W-A	AT3G46560	SOLYC10G086510	PGSC0003DMP400033355	GLYMA12G06770	BRADI4G04290		CONTIG_114266_1	LOC_OS12G38310	PP1S9_158V6	CRE01.G033400	POPTR_0012S03620	SB01G049670	GSVIVT01024961001	GRMZM2G144101
						GLYMA03G19460			MEDTR4G021710		PP1S178_121V6			SB08G018820	GSVIVT01034172001
						GLYMA11G14830
	Tom5	YPR133W-A
	Tom5		AT5G08040	SOLYC03G115030	PGSC0003DMP400042455	GLYMA05G00340	BRADI4G03810			LOC_OS12G38650	PP1S112_191V6		POPTR_0015S06940	SB01G015010	GSVIVT01008105001	GRMZM2G058057
						GLYMA17G08700
	Tom6	YOR045W
	Tom6		AT1G49410	SOLYC01G109220	PGSC0003DMP400043674	GLYMA12G05120	BRADI1G14380			LOC_OS03G42799	PP1S23_86V6		POPTR_0009S11330	SB01G014240		GRMZM2G043127
						GLYMA11G13030					PP1S252_26V6		POPTR_0004S15630
	Tom7	YNL070W
	Tom7		AT1G64220	SOLYC05G047390	PGSC0003DMP400036476	GLYMA08G03150	BRADI2G44080		MEDTR3G055500	LOC_OS05G50654	PP1S34_158V6		POPTR_0006S07720	SB03G028510		GRMZM2G339503
			AT5G41685	SOLYC07G015970	PGSC0003DMP400024206	GLYMA05G36420			MEDTR3G061970		PP1S65_108V6		POPTR_0018S14230
									CONTIG_57213_3				POPTR_0516S00200
	Tom22	YNL131W
	Tom22		AT1G04070	SOLYC06G008120	PGSC0003DMP400023808	GLYMA13G18900	BRADI3G12780		CONTIG_16246_1	LOC_OS02G03880	PP1S18_313V6	CRE13.G600500	POPTR_0002S25900	SB07G023490	GSVIVT01028415001	GRMZM2G318794
			AT5G43970	SOLYC03G005700		GLYMA11G28430				LOC_OS02G29400	PP1S379_37V6		POPTR_0014S18770		GSVIVT01027914001
						GLYMA02G18110							POPTR_0238S00200
						GLYMA11G23890
						GLYMA10G04590
	Tom20	YGR082W
	Tom20		AT5G40930	SOLYC02G094140	PGSC0003DMP400035204	GLYMA18G01030	BRADI2G59080	CHR1.CM0009.160	MEDTR3G085410	LOC_OS01G69250	PP1S276_23V6	CRE12.G534600	POPTR_0001S33780	SB03G044130	GSVIVT01033094001	GRMZM2G100402
			AT3G27080	SOLYC02G068130		GLYMA19G17930					PP1S15_226V6		POPTR_0003S17190			GRMZM2G105531
			AT1G27390			GLYMA05G14300							POPTR_0001S13980
						GLYMA11G37120
	Tom20		AT3G27070
	Mdm10	YAL010C
	Sam37	YMR060C
	Tom40		AT3G20000	SOLYC06G007710	PGSC0003DMP400035024	GLYMA08G05280	BRADI1G63800	CHR4.CM0042.1530	MEDTR8G106010	LOC_OS03G20750	PP1S367_8V6	CRE10.G424450	POPTR_0007S15420	SB01G036760	GSVIVT01038525001	GRMZM2G043983
				SOLYC06G082800	PGSC0003DMP400035023	GLYMA05G34360			MEDTR8G106070				POPTR_0014S00670			GRMZM2G174696
					PGSC0003DMP400035022								POPTR_0014S01090
	Tom40	YMR203W	AT1G50400				BRADI2G10420			LOC_OS01G16910				SB03G011060		GRMZM2G120876
	Oxa1	YER154W	AT2G46470	SOLYC08G008320	PGSC0003DMP400010356	GLYMA13G25140	BRADI3G31430	LJSGA_016301	CONTIG_55764_1	LOC_OS10G37690	PP1S332_22V6	CRE16.G690200	POPTR_0006S07260	SB01G031260	GSVIVT01019529001	GRMZM2G064804
			AT5G62050		PGSC0003DMP400010354	GLYMA07G31320		LJSGA_018745	MEDTR7G036950				POPTR_0001S10600
													POPTR_0018S13680
													POPTR_0513S00210
	Pam16	YJL104W	AT5G61880	SOLYC06G068820	PGSC0003DMP400051463	GLYMA16G27940	BRADI3G28907	CHR2.LJT11L13.70	MEDTR1G098440	LOC_OS10G33910	PP1S27_29V6	CRE09.G412300	POPTR_0012S11040	SB03G046590	GSVIVT01013542001	GRMZM2G048434
			AT3G59280	SOLYC08G006120	PGSC0003DMP400051462	GLYMA06G20480	BRADI2G61480	CHR3.CM0160.400	MEDTR4G116100		PP1S46_211V6		POPTR_0015S11790	SB01G019160	GSVIVT01008650001	GRMZM2G164475
				SOLYC08G069210	PGSC0003DMP400051461						PP1S33_166V6		POPTR_0014S14920	SB03G043490
					PGSC0003DMP400044341
					PGSC0003DMP400026162
					PGSC0003DMP400026161
					PGSC0003DMP400051464
	Pam17
	Erv1	YGR029W	AT1G49880	SOLYC11G071960	PGSC0003DMP400005360	GLYMA13G26970	BRADI1G70790	CHR4.CM0170.170	MEDTR8G045480	LOC_OS03G10850	PP1S172_75V6	CRE14.G633000	POPTR_0009S09340	SB01G043500	GSVIVT01037859001	GRMZM2G114234
						GLYMA15G38020					PP1S1_59V6	CRE03.G173200
	Tim44	YIL022W	AT2G36070	SOLYC01G098230	PGSC0003DMP400038986	GLYMA04G12120	BRADI1G20700		MEDTR2G083690	LOC_OS07G22700	PP1S201_110V6	CRE16.G660800	POPTR_0002S03940	SB02G043830	GSVIVT01028335001	GRMZM2G095695
			AT2G20510						MEDTR4G029490		PP1S56_221V6		POPTR_0005S24590
	Tim21	YGR033C
	Tim21		AT4G00026	SOLYC08G081430	PGSC0003DMP400021816	GLYMA20G35830	BRADI1G67860	LJT43K11.60	CONTIG_129437_1	LOC_OS03G14890	PP1S358_19V6	CRE09.G405550	POPTR_0002S14160	SB01G040840	GSVIVT01022807001	GRMZM2G174236
						GLYMA10G31810	BRADI2G41600						POPTR_0014S05400
													POPTR_0014S05350
	Sam35/Tob38	YHR083W
	Tim23	YNR017W	AT1G17530	SOLYC03G121860	PGSC0003DMP400065324	GLYMA15G03070	BRADI1G77570	CHR3.CM0106.900	MEDTR8G018780	LOC_OS03G02390	PP1S389_49V6	CRE10.G434250	POPTR_0003S04130	SB01G049640	GSVIVT01035979001	GRMZM2G077760
			AT1G72750	SOLYC12G049220	PGSC0003DMP400004399	GLYMA13G42300	BRADI3G31150		MEDTR2G099550		PP1S389_51V6		POPTR_0005S05340	SB01G016950		GRMZM2G368041
			AT3G04800			GLYMA10G30280			MEDTR1G081230				POPTR_0013S03680			GRMZM2G064600
						GLYMA20G36660							POPTR_0001S20520
	Tim22	YDL217C
	Tim22		AT1G18320	SOLYC11G068980	PGSC0003DMP400034119	GLYMA09G35780	BRADI1G65220	CHR3.CM0127.370	MEDTR4G078050	LOC_OS03G18500	PP1S46_248V6	CRE01.G021050	POPTR_0001S28800	SB01G038240	GSVIVT01024670001	GRMZM2G007080
			AT3G10110			GLYMA12G01980			MEDTR4G077950				POPTR_0009S08020
	Pam18	YNL328C	AT2G35795	SOLYC10G086040	PGSC0003DMP400030720	GLYMA13G20060	BRADI1G54787	LJSGA_014379	CONTIG_81613_3	LOC_OS07G09450	PP1S157_85V6	CRE02.G133000	POPTR_0006S13340	SB07G004910	GSVIVT01025634001	GRMZM2G040587
		YLR008C	AT5G03030	SOLYC09G007390	PGSC0003DMP400003157	GLYMA10G05710	BRADI2G00300	CHR3.CM0451.150					POPTR_0008S04310	SB03G005400		GRMZM2G038950
			AT3G09700			GLYMA05G16850		LJSGA_024023
	Mia40	YKL195W	AT5G23395	SOLYC04G008770	PGSC0003DMP400043905	GLYMA07G04420	BRADI5G16340	CHR3.CM0416.1280	MEDTR8G020800	LOC_OS04G44550	PP1S80_95V6		POPTR_0010S26120	SB06G023210	GSVIVT01034352001	GRMZM2G132301
						GLYMA16G01010										GRMZM2G113990
	Tim10	YHR005C-A	AT2G29530	SOLYC09G011760	PGSC0003DMP400035328	GLYMA02G47850	BRADI1G03410	CHR4.CM0525.40	MEDTR2G097870	LOC_OS03G61019	PP1S28_170V6	CRE12.G514900	POPTR_0001S25370	SB01G002840	GSVIVT01024832001	GRMZM2G121743
				SOLYC06G005840	PGSC0003DMP400036211	GLYMA14G00770							POPTR_0009S04450			GRMZM2G156848
						GLYMA15G03940
						GLYMA13G41450
	Metaxin		AT2G19080	SOLYC07G009320	PGSC0003DMP400014954	GLYMA13G00660	BRADI1G48210	CHR4.CM0244.280	MEDTR4G127630	LOC_OS06G07160	PP1S261_53V6	CRE03.G177900	POPTR_0006S07670	SB10G004750	GSVIVT01010902001	GRMZM2G005209
						GLYMA17G06820			MEDTR2G036910		PP1S227_10V6
						GLYMA15G17690
						GLYMA09G06470
	Tom70	YNL070W
		YHR117W
	Tom70		AT1G62390	SOLYC02G081200	PGSC0003DMP400029249	GLYMA17G01320	BRADI1G33010	CHR4.CM0288.860	MEDTR4G132780	LOC_OS09G04990			POPTR_0011S00960	SB03G007020		GRMZM2G013176
				SOLYC02G036360	PGSC0003DMP400037188	GLYMA07G39430							POPTR_0004S00450
	Tom70		AT4G32070	SOLYC08G029190	PGSC0003DMP400045295	GLYMA04G06890	BRADI4G08750	CHR6.CM0037.1370	CONTIG_110842_1	LOC_OS09G38390			POPTR_0018S12490	SB07G004780	GSVIVT01012858001	GRMZM2G077406
			AT5G20360	SOLYC06G065910	PGSC0003DMP400045294	GLYMA09G12000	BRADI3G19980		CONTIG_89488_1	LOC_OS09G03890			POPTR_0006S27450	SB02G014480	GSVIVT01035938001	GRMZM2G468147
			AT2G25290	SOLYC07G007390	PGSC0003DMP400053509	GLYMA17G11580	BRADI4G37590			LOC_OS08G20020			POPTR_0025S00370	SB02G032430		GRMZM2G023275
					PGSC0003DMP400053510	GLYMA13G23250							POPTR_0018S02120
					PGSC0003DMP400033198	GLYMA17G32550
					PGSC0003DMP400026116
	Sam50/Tob55	YNL026W	AT5G05520	SOLYC04G079270	PGSC0003DMP400014131	GLYMA02G43160	BRADI2G22630	CHR6.LJB02K20.10	MEDTR3G071450	LOC_OS05G39390	PP1S294_27V6	CRE06.G308900	POPTR_0008S07180	SB03G038720	GSVIVT01032775001	GRMZM5G832582
			AT3G11070			GLYMA14G06250	BRADI2G53940		MEDTR5G083050		PP1S18_199V6		POPTR_0010S19300	SB09G023080		AC197705.4_FGP007
						GLYMA18G02890
						GLYMA11G35540
	Mim1	YOL026C
	Tim12	YBR091C
	Tim13	YGR181W	AT1G61570	SOLYC08G083380	PGSC0003DMP400021396	GLYMA13G10250	BRADI3G51830	CHR6.CM1823.70	MEDTR3G080670	LOC_OS02G45820	PP1S168_35V6	CRE16.G650800	POPTR_0011S15280	SB04G031720	GSVIVT01019698001	GRMZM2G058432
						GLYMA08G48290							POPTR_0001S45640
	Tim17	YJL143W	AT1G20350	SOLYC11G039910	PGSC0003DMP400052989	GLYMA16G08520	BRADI1G22020	CHR2.CM0065.80	CONTIG_66276_1	LOC_OS07G41330	PP1S303_21V6	CRE10.G452650	POPTR_0018S09490	SB02G038750	GSVIVT01015301001	GRMZM2G321404
			AT2G37410	SOLYC06G082270	PGSC0003DMP400052988	GLYMA01G01110							POPTR_0008S17650			GRMZM2G167463
					PGSC0003DMP400034348	GLYMA20G02120							POPTR_0006S17850
					PGSC0003DMP400034347
	Tim18	YOR297C
		YDR178W
		YRL164W
	Hot13	YKL084W
	OM64		AT5G09420	SOLYC10G047300	PGSC0003DMP400010218	GLYMA08G05870	BRADI1G11110	CHR4.CM0182.360	MEDTR8G107280	LOC_OS03G50010	PP1S167_52V6		POPTR_0012S04440	SB04G027530	GSVIVT01008433001	GRMZM2G159542
			AT3G17970	SOLYC03G118690	PGSC0003DMP400029153	GLYMA08G19070	BRADI3G58760	CHR4.CM0042.2360	CONTIG_55928_1	LOC_OS02G51810	PP1S42_259V6		POPTR_0015S04580	SB01G010650	GSVIVT01038788001	GRMZM5G819320
						GLYMA05G33810		CHR6.CM0314.20			PP1S301_54V6		POPTR_0001S21240
						GLYMA15G05920
						GLYMA05G24400
	Tim54	YJL054W
	Tim50	YPL063W	AT1G55900	SOLYC10G006020	PGSC0003DMP400038378	GLYMA14G01810	BRADI2G50630	CHR2.LJT06P13.50	MEDTR5G095530	LOC_OS01G55700	PP1S192_75V6	CRE12.G505950	POPTR_0001S37500	SB03G035300	GSVIVT01014657001	GRMZM2G035651
					PGSC0003DMP400038379	GLYMA02G46900	BRADI2G20050			LOC_OS05G43770	PP1S134_69V6		POPTR_0011S09550		GSVIVT01030074001	GRMZM5G896568
					PGSC0003DMP400038377
ERAD	Hrd1	YOL013C	AT1G65040	SOLYC03G096930	PGSC0003DMP400046944	GLYMA01G43860	BRADI2G09570	CHR2.CM0018.1210	MEDTR4G077800	LOC_OS06G19680	PP1S242_2V6	CRE03.G210550	POPTR_0013S09710	SB10G011070	GSVIVT01024416001	GRMZM2G055643
			AT3G16090	SOLYC06G072790	PGSC0003DMP400046945	GLYMA11G01330	BRADI1G43000	CHR6.CM0057.420	MEDTR4G077710				POPTR_0019S07830	SB05G003390		GRMZM2G028183
					PGSC0003DMP400046946				MEDTR5G007710
	Cue1	YMR264W
	Dfm1	YDR411C	AT4G29330	SOLYC05G026310		GLYMA08G03630	BRADI2G33360	CHR4.CM0617.260	MEDTR8G102300	LOC_OS05G09550	PP1S213_66V6	CRE12.G523500	POPTR_0006S15780	SB09G005900	GSVIVT01035321001	GRMZM2G117388
						GLYMA05G35990										GRMZM2G143817
	Der1	YBR201W
	Ubc7	YMR022W	AT5G59300	SOLYC05G054550	PGSC0003DMP400040730	GLYMA11G14980	BRADI2G23240	CHR3.CM0786.300	MEDTR4G063490	LOC_OS05G38550	PP1S7_438V6	CRE12.G546650	POPTR_0008S05400	SB03G039320	GSVIVT01016569001	GRMZM2G012052
			AT3G55380	SOLYC05G054540	PGSC0003DMP400040725	GLYMA15G04470	BRADI2G54550			LOC_OS01G62244	PP1S171_53V6		POPTR_0008S05390	SB09G022600	GSVIVT01034196001	GRMZM2G085600
			AT3G46460	SOLYC09G009720	PGSC0003DMP400015765	GLYMA12G06960					PP1S171_143V6		POPTR_0010S21380
						GLYMA13G40990							POPTR_0010S21370
	Ubc6	YER100W	AT5G50430	SOLYC06G063100	PGSC0003DMP400016123	GLYMA16G01680	BRADI1G46730	LJSGA_005221	MEDTR8G023380	LOC_OS06G09330	PP1S366_17V6	CRE08.G372400	POPTR_0001S16230	SB10G006220	GSVIVT01016663001	GRMZM2G177276
			AT1G17280	SOLYC03G123660	PGSC0003DMP400008640	GLYMA07G05170							POPTR_0003S07070			GRMZM2G116919
	Npl4	YBR170C
	Ufd1	YGR048W	AT2G21270	SOLYC01G110410	PGSC0003DMP400009813	GLYMA05G34630	BRADI3G06080	CHR4.CM0042.1240	MEDTR8G105250	LOC_OS04G48770	PP1S245_32V6	CRE14.G613350	POPTR_0004S17010	SB04G005550	GSVIVT01024168001	GRMZM2G037185
					PGSC0003DMP400009807	GLYMA08G05030	BRADI5G19030			LOC_OS02G08480			POPTR_0009S12780	SB06G026100		GRMZM2G114220
	Ufd1		AT4G38930
	Ufd1		AT2G29070			GLYMA13G41280		CHR3.CM0792.40	MEDTR4G064300				POPTR_0001S24900
						GLYMA15G04140		CHR6.CM0013.1650	MEDTR4G064260
									MEDTR4G064330
	Hrd3	YLR207W	AT1G18260	SOLYC03G118670		GLYMA05G33770	BRADI1G67570	CHR4.CM0042.2420	MEDTR8G107400	LOC_OS03G15350	PP1S121_71V6	CRE03.G197400	POPTR_0015S04640	SB01G040530	GSVIVT01008448001	GRMZM2G372398
			AT1G73570			GLYMA08G05930					PP1S20_318V6		POPTR_0012S04370
											PP1S20_165V6
	Usa1	YML029W
	Ubx2	YML013W
	Ubx2		AT3G27310	SOLYC02G093820	PGSC0003DMP400035226	GLYMA19G24300	BRADI5G13850	LJSGA_122090	MEDTR6G023080	LOC_OS04G40870	PP1S130_285V6		POPTR_0001S27170	SB06G020636	GSVIVT01001850001	GRMZM2G461557
						GLYMA16G06840		LJSGA_089150					POPTR_0009S06420			GRMZM2G142712
	Doa10	YIL030C
	Doa10		AT4G34100	SOLYC01G107880	PGSC0003DMP400044892	GLYMA02G11570	BRADI1G30330	CHR4.CM0227.540	MEDTR4G085550	LOC_OS06G43210	PP1S1828_1V6		POPTR_0009S10230	SB10G025050	GSVIVT01022083001	GRMZM2G051792
					PGSC0003DMP400044893	GLYMA07G33840					PP1S189_9V6		POPTR_0001S31170		GSVIVT01031710001	GRMZM2G145104
											PP1S59_95V6
											PP1S24_35V6
	Cdc48	YDL126C	AT3G09840	SOLYC11G069720	PGSC0003DMP400021243	GLYMA04G35950	BRADI1G75570	CHR1.CM0012.1370	MEDTR7G101640	LOC_OS10G30580	PP1S217_30V6	CRE06.G269950	POPTR_0012S09000	SB07G020190	GSVIVT01007689001	GRMZM2G703490
			AT5G03340	SOLYC09G008070	PGSC0003DMP400031543	GLYMA13G39830	BRADI1G74916	CHR5.LJT37C05.70	MEDTR7G101870	LOC_OS03G05730	PP1S133_13V6		POPTR_0017S14340	SB01G047440	GSVIVT01031517001	GRMZM2G063060
			AT3G53230	SOLYC03G112590	PGSC0003DMP400037374	GLYMA10G06480	BRADI1G74922	CHR1.CM0171.740	AC235487_28	LOC_OS08G31870	PP1S115_6V6		POPTR_0006S12740	SB01G046840	GSVIVT01025723001	GRMZM2G103186
				SOLYC10G084050	PGSC0003DMP400037373	GLYMA19G36740		CHR3.CM0649.60	CONTIG_53755_1		PP1S213_38V6		POPTR_0015S09220	SB01G020910		GRMZM2G036765
				SOLYC06G074980	PGSC0003DMP400018483	GLYMA12G08410			AC235487_5		PP1S296_11V6		POPTR_0016S09280			AC233949.1_FGP004
					PGSC0003DMP400034195	GLYMA06G19000					PP1S99_139V6
						GLYMA03G33990
						GLYMA13G20680
						GLYMA12G30060
						GLYMA11G20060
ER	Srp54p	YPR088C	AT5G49500	SOLYC03G116810	PGSC0003DMP400001242	GLYMA08G22820	BRADI2G51400	CHR3.CM0142.250	MEDTR2G104050	LOC_OS01G56600	PP1S7_75V6	CRE13.G569200	POPTR_0016S12030	SB09G025050	GSVIVT01017362001	GRMZM2G060324
			AT1G48900	SOLYC12G042740	PGSC0003DMP400001243	GLYMA07G03290	BRADI2G20340	CHR4.CM0432.4010	MEDTR4G010050	LOC_OS05G43390	PP1S26_93V6		POPTR_0001S26040	SB03G036030		GRMZM2G079257
			AT1G15310		PGSC0003DMP400049876	GLYMA15G00930								SB01G014030		GRMZM2G038953
						GLYMA13G44330
	SR/SRP101	YDR292C	AT4G30600	SOLYC12G009990	PGSC0003DMP400013942	GLYMA06G28570	BRADI3G10590	CHR6.CM0037.440	MEDTR4G130770	LOC_OS08G37444	PP1S92_8V6	CRE16.G683950	POPTR_0006S19720	SB01G050330	GSVIVT01023620001	GRMZM2G060296
					PGSC0003DMP400013941	GLYMA17G08100	BRADI1G78220	CHR4.CM0179.200			PP1S290_35V6		POPTR_0018S11500	SB09G003220
	SR/SRP102	YKL154W	AT5G05670	SOLYC11G043150	PGSC0003DMP400000893	GLYMA01G03540	BRADI3G40790	CHR2.CM0008.320	MEDTR4G071550	LOC_OS06G27870	PP1S201_7V6	CRE17.G718350	POPTR_0002S02250	SB07G019530	GSVIVT01007725001	GRMZM2G015642
			AT2G18770	SOLYC03G112450	PGSC0003DMP400000894	GLYMA02G04110	BRADI2G61180			LOC_OS08G41250				SB08G000320	GSVIVT01013784001
														SB05G000300
	Ssh1p	YBR283C
	Sss1p	YDR086C
	Sss1p		AT4G24920		PGSC0003DMP400047003	GLYMA14G05800	BRADI1G31180	CHR4.LJT25I18.40	MEDTR4G127150	LOC_OS06G44374	PP1S109_202V6	CRE01.G068150	POPTR_0012S10040	SB04G005280	GSVIVT01033084001	AC208023.3_FGP001
			AT5G50460		PGSC0003DMP400026669	GLYMA12G28990	BRADI3G05820	CHR2.CM1032.410	MEDTR5G084060	LOC_OS02G08180	PP1S376_32V6		POPTR_0015S10930	SB10G026000	GSVIVT01008551001	GRMZM2G089491
											PP1S3_513V6		POPTR_0001S33700			GRMZM2G363447
											PP1S142_57V6					GRMZM2G431703
	Sec63p	YOR254C	AT4G21180	SOLYC03G007610	PGSC0003DMP400016796	GLYMA09G08830	BRADI1G42010	LJSGA_011072	MEDTR2G044580	LOC_OS04G24180	PP1S241_31V6	CRE16.G657850	POPTR_0017S00980	SB09G006310	GSVIVT01028825001	GRMZM2G167868
			AT1G79940	SOLYC09G009180	PGSC0003DMP400016797	GLYMA15G20400	BRADI5G05060	LJSGA_147988					POPTR_0004S07070			GRMZM2G007871
					PGSC0003DMP400004794											GRMZM2G009346
	Sec61p	YLR378C	AT1G29310	SOLYC02G072130	PGSC0003DMP400036835	GLYMA06G32680	BRADI4G28500	CHR4.CM0165.180	MEDTR8G058330	LOC_OS03G48590	PP1S114_48V6	CRE03.G171350	POPTR_0001S39590	SB01G043020	GSVIVT01014171001	GRMZM2G307252
			AT1G78720	SOLYC10G007390	PGSC0003DMP400036834	GLYMA12G35990	BRADI1G70160		MEDTR8G076770	LOC_OS09G17830	PP1S323_56V6		POPTR_0011S10920			GRMZM2G130987
			AT2G34250		PGSC0003DMP400049442	GLYMA13G34370				LOC_OS03G11440			POPTR_0011S11550			GRMZM2G073498
						GLYMA12G17950				LOC_OS09G17840			POPTR_0011S11480
	Sec71p/ Sec66p	YBR171W
	Sbh2p	YER019C-A
	Sbh2p		AT3G60540		PGSC0003DMP400012394	GLYMA03G04010		LJSGA_027168	MEDTR4G028080	LOC_OS12G07490			POPTR_0014S05810		GSVIVT01018177001
			AT2G45070		PGSC0003DMP400012395	GLYMA01G32870			MEDTR8G086330				POPTR_0002S14410		GSVIVT01018182001
					PGSC0003DMP400012396
					PGSC0003DMP400012397
					PGSC0003DMP400012398
	Sbh2p		AT5G60460	SOLYC03G116990	PGSC0003DMP400034445	GLYMA12G29340	BRADI4G26700	LJSGA_015543	MEDTR2G093770	LOC_OS11G01300	PP1S292_15V6	CRE07.G318450	POPTR_0009S01720	SB09G001550		GRMZM2G045971
					PGSC0003DMP400062639	GLYMA13G40270			MEDTR1G082400		PP1S353_4V6
	Srp14p	YDL092W
	Sec65	YML105C	AT1G48160	SOLYC08G082740	PGSC0003DMP400021449	GLYMA02G07200	BRADI5G13655		CONTIG_170217_1	LOC_OS06G23430	PP1S315_24V6	CRE11.G471200	POPTR_0012S04280	SB06G018340	GSVIVT01017663001	GRMZM2G167262
						GLYMA16G26150	BRADI5G13640						POPTR_0015S04780		GSVIVT01017602001	GRMZM2G077744
	Srp72p	YPL210C
	Srp72p		AT1G67680	SOLYC11G062270	PGSC0003DMP400055521	GLYMA05G27690	BRADI2G57350	LJSGA_014721	CONTIG_53673_1	LOC_OS01G66560	PP1S234_73V6	CRE03.G182500	POPTR_0006S23290	SB03G042250	GSVIVT01010320001	GRMZM2G070562
			AT1G67650	SOLYC01G047590					CONTIG_166918_1
	Srp68p	YPL243W
	Sec62p	YPL094C
	Sec62p		AT3G20920	SOLYC01G008470	PGSC0003DMP400012996	GLYMA08G45020	BRADI3G11530	CHR6.CM0169.250	MEDTR3G061490	LOC_OS02G23890	PP1S15_241V6	CRE02.G084050	POPTR_0001S26460	SB01G001670	GSVIVT01025251001	AC217358.3_FGP011
				SOLYC11G065690	PGSC0003DMP400012997	GLYMA18G07900					PP1S276_43V6		POPTR_0009S05750
					PGSC0003DMP400018933
	Get1	YGL020C
	Get2	YER083C
	Get3	YDL100C	AT1G01910	SOLYC10G017810	PGSC0003DMP400000010	GLYMA07G08650	BRADI4G35540	LJB14E16.80	CONTIG_48386_1	LOC_OS09G34970	PP1S173_144V6	CRE03.G204800	POPTR_0014S07410	SB02G030280	GSVIVT01027593001	AC199782.5_FGP001
				SOLYC01G091880	PGSC0003DMP400012413	GLYMA03G02060		LJB14E16.100			PP1S34_371V6		POPTR_0002S15390
				SOLYC05G050480	PGSC0003DMP400057442
				SOLYC05G050490	PGSC0003DMP400012414
					PGSC0003DMP400018134
					PGSC0003DMP400018135
	Get4	YOR164C	AT5G63220	SOLYC12G017820	PGSC0003DMP400013542	GLYMA10G35830	BRADI2G03980	CHR5.CM1667.100	MEDTR1G095910	LOC_OS01G07100	PP1S42_178V6	CRE06.G282950	POPTR_0008S04370	SB03G005010	GSVIVT01016338001	GRMZM2G048804
				SOLYC08G015990	PGSC0003DMP400004002	GLYMA20G31760					PP1S31_308V6		POPTR_0010S22440
	Get5	YOL111C
	AtTPR7		AT5G21990	SOLYC06G073840	PGSC0003DMP400010538	GLYMA06G46490	BRADI1G56980	LJSGA_044281	CONTIG_9593_1	LOC_OS07G06710	PP1S80_155V6	CRE02.G092550	POPTR_0009S15380	SB02G003490	GSVIVT01037520001	GRMZM5G878044
						GLYMA12G10270	BRADI2G26880		CONTIG_240625_1				POPTR_0004S20190			GRMZM2G542497
	Srp21	YKL122C
	Srp7p
	Sbh1p	YER087C-B
	Sbh1p		AT3G60540		PGSC0003DMP400012394	GLYMA03G04010		LJSGA_027168	MEDTR4G028080	LOC_OS12G07490			POPTR_0014S05810		GSVIVT01018177001
			AT2G45070		PGSC0003DMP400012395	GLYMA01G32870			MEDTR8G086330				POPTR_0002S14410		GSVIVT01018182001
					PGSC0003DMP400012396
					PGSC0003DMP400012397
					PGSC0003DMP400012398
	Sgt2	YOR007C
	Sgt2		AT4G08320	SOLYC11G012900		GLYMA13G03270	BRADI5G27367	CHR6.CM0302.20	MEDTR1G030300	LOC_OS04G59394			POPTR_0005S19980	SB06G033950		GRMZM5G827171
	Sec72p/ Sec67p	YLR292C
