# Supplementary material for: The protein translocation systems in plants – composition and variability on the example of Solanum lycopersicum
Source: BMC Genomics. 2013 Mar 18;14:189. doi: 10.1186/1471-2164-14-189 (PMC3610429; doi:10.1186/1471-2164-14-189)
Supplement: Additional file 15: — The shared synteny analysis of Arabidopsis and tomato protein translocation factors. Shared synteny between translocation factors of tomato and Arabidopsis. The first column gives the compartment and the second the translocation factor. The third column consist the AGI of Arabidopsis and the fourth column the identifier of the SGN for tomato. The last three columns (5– 7) give the syntenic score for OrthoMCL (column 5); InParanoid (column 6) and both methods (column 7). The syntenic score is calculated for each pair of orthologues in Arabidopsis and tomato for the factor of interest. Number of orthologues for seven genes upstream and seven genes downstream of the genes of interest in Arabidopsis and tomato are listed as syntenic score. [file 1471-2164-14-189-S15.xlsx]

## Sheet: neighbor(1)
Additiona file 10. Shared synteny between translocation factors of tomato and Arabidopsis. The first column gives the compartment and the second the translocation factor. The third column consist the AGI of Arabidopsis and the fourth column the identifier of the SGN for tomato. The last three columns (5– 7) give the syntenic score for OrthoMCL (column 5); InParanoid (column 6) and both methods (c…
compartment	Factor	AGI_ID	SGN_ID	syntenic_OrthoMCL	syntenic_Inparanoid	syntenic_both
Chloroplast	cpFtsY	AT2G45770	SOLYC01G091580	1	1	1
	cpTatC	AT2G01110	SOLYC05G008530	2	2	2
	atTic110	AT1G06950	SOLYC09G031780	0	0	0
	atToc12	AT1G80920	SOLYC03G117590	3	3	3
			SOLYC06G068500	2	2	2
	atTic32-IVa	AT4G23430	SOLYC03G025410	0	1	1
			SOLYC03G025390	0	1	1
			SOLYC03G025400	0	1	1
		AT4G23420	SOLYC03G025410	0	1	1
			SOLYC03G025390	0	1	1
			SOLYC03G025400	0	1	1
	atTic32-IVb	AT4G11410	SOLYC08G081200	0	0	0
	atToc120	AT3G16620	SOLYC11G043010	0	0	0
			SOLYC01G080780	0	0	0
	atTic20-I	AT1G04940	SOLYC01G074020	0	0	0
			SOLYC05G054720	0	0	0
			SOLYC04G076740	0	0	0
		AT1G04945	SOLYC01G074020	0	0	0
			SOLYC05G054720	0	0	0
			SOLYC04G076740	0	0	0
	atToc75-V/AtOEP80	AT5G19620	SOLYC11G062070	0	0	0
			SOLYC10G079290	0	0	0
	atTic55	AT2G24820	SOLYC12G096550	1	2	2
	cpSecY1	AT2G18710	SOLYC07G006520	2	2	2
	cpSecY2	AT2G31530	SOLYC09G065120	0	0	0
	atToc75-III	AT3G46740	SOLYC06G076360	1	1	1
	cpSecA1	AT4G01800	SOLYC01G080840	2	2	2
	cpSecA2	AT1G21650	SOLYC11G005030	4	0	4
			SOLYC11G005020	3	1	3
			SOLYC11G005040	4	0	4
		AT1G21651	SOLYC11G005030	4	0	4
			SOLYC11G005020	3	0	3
			SOLYC11G005040	4	0	4
	atToc75-IV	AT4G09080	NF
	Hcf106	AT5G52440	SOLYC03G025310	2	2	2
	atTic22-IV	AT4G33350	SOLYC04G079000	3	2	3
	ALB3	AT2G28800	SOLYC11G066110	5	4	5
	cpSRP43	AT2G47450	SOLYC02G087400	0	0	0
	atTic20-V	AT5G55710	SOLYC12G015680	0	0	0
	atToc64-V	AT5G09420	SOLYC10G047300	3	3	3
	atTic22-III	AT3G23710	SOLYC09G092530	2	2	3
	atToc132	AT2G16640	SOLYC01G111240	1	1	1
	atToc64-I	AT1G08980	SOLYC10G086170	0	0	0
	atToc90	AT5G20300	SOLYC07G007650	0	0	0
	atTic62	AT3G18890	SOLYC10G051110	0	0	0
	atToc64-III	AT3G17970	SOLYC03G118690	5	5	5
	atTic20-IV	AT4G03320	NF
	Tic22like	AT5G62650	SOLYC03G007620	0	0	0
	atTic21	AT2G15290	SOLYC01G107640	5	3	5
	atToc159	AT4G02510	SOLYC09G074940	2	2	2
	Tha4	AT5G28750	SOLYC01G097310	1	0	1
	atTic40	AT5G16620	SOLYC11G020300	0	0	0
	cpSecE	AT4G14870	NF
	atToc34	AT5G05000	SOLYC03G095220	0	0	0
	atToc33	AT1G02280	SOLYC05G052160	0	0	0
	atTic20-II	AT2G47840	SOLYC11G008980	0	0	0
	cpSRP54	AT5G03940	SOLYC09G009940	1	1	1
Mitochondria	Tim8	AT5G50810	SOLYC06G072600	4	5	6
			SOLYC03G097640	0	4	4
	Tim9	AT3G46560	SOLYC10G086510	2	1	2
			SOLYC08G048070	0	0	0
	Tom5	AT5G08040	SOLYC03G115030	3	3	3
	Tom6	AT1G49410	SOLYC01G109220	1	1	1
	Tom7	AT1G64220	SOLYC05G047390	0	0	0
			SOLYC07G015970	0	0	0
		AT5G41685	SOLYC05G047390	0	0	0
			SOLYC07G015970	0	0	0
	Tom22	AT1G04070	SOLYC06G008120	0	0	0
			SOLYC03G005700	0	0	0
		AT5G43970	SOLYC06G008120	0	0	0
			SOLYC03G005700	0	0	0
	Tom20	AT5G40930	SOLYC02G094140	1	0	1
			SOLYC02G068130	1	0	1
		AT3G27080	SOLYC02G094140	3	2	3
			SOLYC02G068130	3	3	3
		AT3G27070	SOLYC02G094140	0	0	0
			SOLYC02G068130	0	0	0
		AT1G27390	SOLYC02G094140	0	0	0
			SOLYC02G068130	0	0	0
	Tom40	AT1G50400	SOLYC06G007710	0	0	0
			SOLYC06G082800	0	0	0
		AT3G20000	SOLYC06G007710	0	0	0
			SOLYC06G082800	0	0	0
	Oxa1	AT2G46470	SOLYC08G082290	0	0	0
			SOLYC08G008320	0	0	0
		AT5G62050	SOLYC08G082290	0	0	0
			SOLYC08G008320	1	0	1
	Pam16	AT5G61880	SOLYC06G068820	3	1	3
			SOLYC00G074210	0	0	0
			SOLYC08G006120	0	0	0
			SOLYC08G069210	0	0	0
		AT3G59280	SOLYC06G068820	0	0	0
			SOLYC00G074210	0	0	0
			SOLYC08G006120	0	0	0
			SOLYC08G069210	0	0	0
	Erv1	AT1G49880	SOLYC11G071960	0	0	0
	Tim44	AT2G36070	SOLYC01G098230	0	0	0
		AT2G20510	SOLYC01G098230	0	0	0
	Tim21	AT4G00026	SOLYC08G081430	0	0	0
	Tim23	AT1G17530	SOLYC10G024350	0	0	0
			SOLYC03G121860	3	2	3
			SOLYC12G049220	1	0	1
		AT1G72750	SOLYC10G024350	0	0	0
			SOLYC03G121860	7	4	7
			SOLYC12G049220	0	0	0
		AT3G04800	SOLYC10G024350	0	0	0
			SOLYC03G121860	0	0	0
			SOLYC12G049220	0	0	0
	Tim22	AT1G18320	SOLYC11G068980	0	0	0
		AT3G10110	SOLYC11G068980	0	0	0
	Pam18	AT2G35795	SOLYC10G086040	0	0	0
			SOLYC09G007390	0	0	0
			SOLYC06G072330	0	0	0
		AT5G03030	SOLYC10G086040	2	2	2
			SOLYC09G007390	4	4	4
			SOLYC06G072330	0	0	0
		AT3G09700	SOLYC10G086040	2	3	3
			SOLYC09G007390	7	6	8
			SOLYC06G072330	0	0	0
	Mia40	AT5G23395	SOLYC04G008770	3	3	3
	Metaxin	AT2G19080	SOLYC07G009320	0	0	0
	Tom70	AT1G62390	SOLYC02G081200	0	0	0
			SOLYC02G036360	0	0	0
		AT5G20360	SOLYC02G081200	0	0	0
			SOLYC02G036360	0	0	0
	Sam50/Tob55	AT5G05520	SOLYC04G079270	0	0	0
		AT3G11070	SOLYC04G079270	0	0	0
	Tim10	AT2G29530	SOLYC09G011760	1	0	1
			SOLYC06G005840	1	1	1
	Tim13	AT1G61570	SOLYC08G083380	0	0	0
	Tim17	AT1G20350	SOLYC11G039910	0	0	0
			SOLYC06G082270	0	0	0
		AT2G37410	SOLYC11G039910	0	0	0
			SOLYC06G082270	0	0	0
	OM64	AT5G09420	SOLYC10G047300	3	3	3
	Tim50	AT1G55900	SOLYC10G006020	0	0	0
ERAD	Ubx2	AT3G27310	SOLYC02G093820	5	3	5
	Dfm1	AT4G29330	SOLYC05G026310	0	0	0
	Ubc6	AT5G50430	SOLYC06G063100	1	1	1
			SOLYC03G123660	1	0	1
		AT1G17280	SOLYC06G063100	2	2	2
			SOLYC03G123660	2	1	2
	Ubc7	AT5G59300	SOLYC04G011430	0	0	0
			SOLYC05G054550	1	0	1
			SOLYC05G054540	1	0	1
			SOLYC09G009720	0	0	0
		AT3G55380	SOLYC04G011430	0	2	2
			SOLYC05G054550	4	3	4
			SOLYC05G054540	4	3	4
			SOLYC09G009720	0	0	0
		AT3G46460	SOLYC04G011430	0	0	0
			SOLYC05G054550	1	0	1
			SOLYC05G054540	1	0	1
			SOLYC09G009720	0	0	0
	Ufd1	AT2G21270	SOLYC01G110410	6	7	7
		AT4G38930	SOLYC01G110410	0	6	6
		AT2G29070	SOLYC01G110410	0	0	0
	Hrd3	AT1G18260	SOLYC03G118670	2	2	2
		AT1G73570	SOLYC03G118670	1	0	1
	Hrd1	AT1G65040	SOLYC03G096930	0	0	0
			SOLYC06G072790	1	0	1
		AT3G16090	SOLYC03G096930	0	0	0
			SOLYC06G072790	0	0	0
	Doa10	AT4G32670	SOLYC01G107880	0	0	0
		AT4G34100	SOLYC01G107880	6	4	6
	Cdc48	AT3G09840	SOLYC11G069720	0	0	0
			SOLYC09G008070	1	1	1
			SOLYC03G112590	0	0	0
			SOLYC10G084050	1	1	2
			SOLYC06G074980	0	0	0
		AT5G03340	SOLYC11G069720	0	0	0
			SOLYC09G008070	3	2	3
			SOLYC03G112590	0	0	0
			SOLYC10G084050	0	0	0
			SOLYC06G074980	0	0	0
		AT3G53230	SOLYC11G069720	0	0	0
			SOLYC09G008070	0	0	0
			SOLYC03G112590	0	0	0
			SOLYC10G084050	0	0	0
			SOLYC06G074980	0	0	0
ER	Srp54p	AT5G49500	SOLYC03G116810	0	0	0
			SOLYC12G042740	0	0	0
		AT1G48900	SOLYC03G116810	0	0	0
			SOLYC12G042740	0	0	0
		AT1G15310	SOLYC03G116810	1	1	1
			SOLYC12G042740	0	0	0
	SR/SRP101	AT4G30600	SOLYC12G009990	2	0	2
	SR/SRP102	AT2G18770	SOLYC11G043150	0	0	0
			SOLYC03G112450	0	0	0
		AT5G05670	SOLYC11G043150	0	0	0
			SOLYC03G112450	0	0	0
	Sss1p	AT4G24920	NF
		AT3G48570	NF
		AT5G50460	NF
	Sec63p	AT4G21180	SOLYC03G007610	1	1	1
			SOLYC09G009180	0	0	0
		AT1G79940	SOLYC03G007610	0	0	0
			SOLYC09G009180	0	0	0
	Sec61p	AT1G29310	SOLYC02G072130	4	3	4
			SOLYC10G007390	0	0	0
		AT1G78720	SOLYC02G072130	0	0	0
			SOLYC10G007390	5	5	5
		AT2G34250	SOLYC02G072130	0	0	0
			SOLYC10G007390	0	0	0
	Sbh2p	AT5G60460	SOLYC06G010060	0	1	1
		AT2G45070	SOLYC06G010060	0	0	0
	AtTPR7	AT5G21990	SOLYC06G073840	2	0	2
	Sec65	AT1G48160	SOLYC08G082740	0	0	0
	Srp72p	AT1G67680	SOLYC10G033560	0	0	0
			SOLYC00G287330	0	0	0
			SOLYC11G062270	0	0	0
			SOLYC01G047590	0	0	0
		AT1G67650	SOLYC10G033560	0	0	0
			SOLYC00G287330	0	0	0
			SOLYC11G062270	0	0	0
			SOLYC01G047590	0	0	0
	Sec62p	AT3G20920	SOLYC11G065690	1	1	1
			SOLYC01G008470	0	0	0
	Get3	AT1G01910	SOLYC10G017810	0	0	0
			SOLYC01G091880	3	3	3
			SOLYC05G050480	0	0	0
			SOLYC05G050490	0	0	0
	Get4	AT5G63220	SOLYC12G017820	0	0	0
			SOLYC08G015990	0	0	0
	Sbh1p	AT3G60540	SOLYC03G116990	0	0	0
	Sgt2	AT4G08320	SOLYC11G012900	3	3	3
Peroxisome	Pex2p	AT1G79810	SOLYC06G066570	3	2	3
	Pex10p	AT2G26350	SOLYC04G080930	0	0	0
	Pex22p	AT3G21865	SOLYC12G005760	1	1	2
			SOLYC07G052600	3	3	3
	Pex12p	AT3G04460	SOLYC05G054950	3	2	3
	Pex13p	AT3G07560	SOLYC06G007700	1	1	1
	Ubc4	AT5G41700	SOLYC06G082600	0	0	0
	Pex3p	AT3G18160	SOLYC03G119030	3	3	3
		AT1G48635	SOLYC03G119030	1	1	1
	Ubc5	AT4G27960	SOLYC02G083570	0	0	0
			SOLYC01G095490	0	0	0
			SOLYC06G007510	0	0	0
			SOLYC03G007470	2	2	2
			SOLYC08G008220	0	0	0
			SOLYC07G066080	0	0	0
			SOLYC10G011740	0	0	0
			SOLYC05G050230	0	0	0
			SOLYC12G056100	0	0	0
			SOLYC03G033410	0	0	0
		AT2G16740	SOLYC02G083570	0	0	0
			SOLYC01G095490	0	0	0
			SOLYC06G007510	0	0	0
			SOLYC03G007470	0	0	0
			SOLYC08G008220	0	0	0
			SOLYC07G066080	0	0	0
			SOLYC10G011740	0	0	0
			SOLYC05G050230	0	0	0
			SOLYC12G056100	0	0	0
			SOLYC03G033410	0	0	0
		AT5G56150	SOLYC02G083570	0	0	0
			SOLYC01G095490	0	0	0
			SOLYC06G007510	0	0	0
			SOLYC03G007470	0	0	0
			SOLYC08G008220	0	0	0
			SOLYC07G066080	0	5	5
			SOLYC10G011740	0	0	0
			SOLYC05G050230	0	0	0
			SOLYC12G056100	0	0	0
			SOLYC03G033410	0	0	0
		AT3G08690	SOLYC02G083570	0	0	0
			SOLYC01G095490	0	0	0
			SOLYC06G007510	0	0	0
			SOLYC03G007470	0	0	0
			SOLYC08G008220	0	0	0
			SOLYC07G066080	0	0	0
			SOLYC10G011740	0	0	0
			SOLYC05G050230	0	0	0
			SOLYC12G056100	0	0	0
			SOLYC03G033410	0	0	0
		AT5G53300	SOLYC02G083570	0	0	0
			SOLYC01G095490	0	0	0
			SOLYC06G007510	0	0	0
			SOLYC03G007470	4	0	4
			SOLYC08G008220	0	0	0
			SOLYC07G066080	0	0	0
			SOLYC10G011740	0	0	0
			SOLYC05G050230	0	0	0
			SOLYC12G056100	0	0	0
			SOLYC03G033410	0	0	0
		AT1G64230	SOLYC02G083570	0	0	0
			SOLYC01G095490	0	0	0
			SOLYC06G007510	0	0	0
			SOLYC03G007470	0	0	0
			SOLYC08G008220	1	0	1
			SOLYC07G066080	0	0	0
			SOLYC10G011740	0	0	0
			SOLYC05G050230	0	0	0
			SOLYC12G056100	1	2	2
			SOLYC03G033410	0	0	0
	Pex19p	AT3G03490	SOLYC06G060720	0	0	0
		AT5G17550	SOLYC06G060720	0	0	0
	Pex7p	AT1G29260	SOLYC03G062940	0	0	0
	Pex5p	AT5G56290	SOLYC10G005650	2	1	2
	Pex4p	AT5G25760	SOLYC11G071260	0	0	0
	Pex1p	AT5G08470	SOLYC04G057960	0	0	0
	Pex6p	AT1G03000	SOLYC06G008730	1	0	1
	Pex15p	AT3G10572	SOLYC12G017470	0	0	0
			SOLYC07G017290	0	0	0
	Pex14p	AT5G62810	SOLYC06G071470	0	1	1
			SOLYC03G114330	0	1	1
